## 17 ABSTRACT

18 Epithelial cells are polarised within the plane of the epithelium, forming oriented  
19 structures whose coordinated and consistent polarity (planar cell polarity, PCP)  
20 relates to the principal axes of the body or organ. In *Drosophila* at least two separate  
21 molecular systems generate and interpret intercellular polarity signals: Dachous/Fat,  
22 and the “core” or Stan system. Here we study the *prickle* gene and its protein products  
23 Prickle and Spiny leg. Much research on PCP has focused on the asymmetric  
24 localisation of proteins in the cell and as a result *prickle* was placed in the heart of the  
25 Stan system. Here we ask if this view is correct and how the *prickle* gene relates to the  
26 two systems. We find that *prickle* can affect, separately, both systems — however,  
27 neither Pk nor Sple are essential components of the Ds/Ft or the Stan system, nor do  
28 they act as a functional link between the two systems.

## 29 INTRODUCTION

30 Planar cell polarity (PCP) refers to a property that all, or most, epithelial cells have —  
31 they are coordinately oriented in the plane of the epithelial sheet and, sometimes, they  
32 demonstrate this by forming oriented structures. These oriented structures can be cell  
33 organelles such as cilia, or multicellular organs such as mammalian hairs (Tree et al.,  
34 2002a; Wang and Nathans, 2007; Goodrich and Strutt, 2011; Butler and Wallingford,  
35 2017). *Drosophila* has been used to identify most of the genes involved in PCP and has  
36 proved the most amenable of all animals for elucidating its mechanisms. Most studies  
37 have asked where PCP gene products are localised in the cell and asked how these  
38 localisations relate to the propagation of polarity from cell to cell. Here we study one  
39 PCP gene, *prickle* (*pk*) which has been investigated intensively over the last 20 years.  
40 We design genetic experiments aimed at clarifying its function in the wildtype,  
41 particularly in relation to the two best defined PCP systems, the Dachous/Fat (Ds/Ft)  
42 system and the Starry night (Stan) or core system.

## 43 A brief history of *pk*

44 The *pk* mutant was discovered in 1938 by Ives who described the thoracic bristles as  
45 disoriented: “irregularly erected and whorled, giving a prickle effect” (Ives, 1947).  
46 Later, a similar and closely linked mutation *spiny legs* (*sple*) was found (Gubb and  
47 Garcia-Bellido, 1982). Each mutation affects one of two homologous transcripts of the  
48 *pk* gene that encode the Pk and Sple proteins; both proteins contain protein-protein  
49 binding LIM domains, they differ in the N terminus (Gubb et al., 1999) and have  
50 sequence elements conserved to vertebrates. In vertebrates, many syndromes due to

51 *pk* mutations have been classified, perhaps prematurely, as planar polarity phenotypes  
52 ([Tissir and Goffinet, 2013](#)).

### 53 **(i) *pk*: a founding member of the “core” PCP pathway**

54 In the 1990s, the *pk* gene was grouped with a few other genes that affected polarity;  
55 their proteins constituted the “core system”, all being asymmetrically but briefly  
56 localised in the wing cell just prior to formation of an oriented hair; for example, Pk is  
57 enriched on or near the proximal membrane of each cell ([Tree et al., 2002b](#)), while  
58 Frizzled (Fz) is localised distally ([Strutt, 2001](#)). Other core proteins include Vang  
59 Gogh (Vang), Dishevelled (Dsh) and Stan, also known as Flamingo (for a review see  
60 [Goodrich and Strutt, 2011](#); [Adler, 2012](#); [Butler and Wallingford, 2017](#)). The  
61 localisation of these proteins is mutually dependent; when one protein is removed, the  
62 others become evenly distributed around the cell periphery (reviewed in [Strutt and](#)  
63 [Strutt, 2009](#)). These observations led to a hypothesis that sets of core proteins associate  
64 asymmetrically on the wing cell membrane, proximally or distally, as a response to the  
65 direction of slope of a tissue-wide polarising gradient ([Tree et al., 2002a](#); [Strutt and](#)  
66 [Strutt, 2008](#); [Strutt, 2009](#)). Tree et al ([2002b](#)) then built a model in which Dsh, Pk and  
67 Fz interact with each other to amplify their asymmetric localisation within the cell to  
68 consolidate its polarity. They argued that “*planar cell polarity signaling in Drosophila*  
69 *requires the receptor Frizzled and the cytoplasmic proteins Dishevelled and Prickle.*”  
70 Perhaps most significantly they proposed that Pk in one cell interacts or “*is linked*” to  
71 the localisation of Fz and Dsh in the adjacent cell, ie there would be an intercellular  
72 bridge consisting of two different complexes facing each other across the cell  
73 membrane. This model is still widely accepted and Pk is considered to be an essential  
74 component of this link.

### 75 **(ii) Pk is not needed for PCP signalling by the Stan system**

76 Nevertheless, genetic experiments argue that, functionally, Pk and Sple are not  
77 required for polarity signalling from cell to cell. Adler et al. ([2000](#)) found that a weak  
78 allele of *pk* actually increased those local changes in cell polarity that are induced by  
79 clones mutant for other core genes. Further, Lawrence et al. ([2004](#)) showed that  
80 complete loss of Pk and Sple also increases polarisation by the core system genes; they  
81 proposed that the key molecules in the core system do not include Pk but are Stan, Fz  
82 and Vang. By contrast with the behaviour of *pk*, removal of each of these genes either  
83 blocks (*stan* or *fz*) or severely impairs (*Vang*) intercellular propagation of PCP by the  
84 Stan system ([Taylor et al., 1998](#); [Lawrence et al., 2004](#); [Strutt and Strutt, 2007](#); [Strutt](#)  
85 [and Warrington, 2008](#); [Struhl et al., 2012](#)). We renamed the core system the “Stan  
86 system” to emphasise the unique and central role of Stan; we use this name from now

87 on. This conclusion was later supported by Strutt and Strutt (2007) who presented  
88 further evidence that “*Dishevelled, Prickle and Diego are not needed for intercellular*  
89 *communication*” —they are not required for the propagation of polarity from cell to  
90 cell.

### 91 (iii) What are the functions of Pk and Sple?

92 When only the *pk* isoform is overexpressed everywhere, polarity of the A  
93 compartment is almost entirely reversed while the P compartment is normal. By  
94 contrast, when the *sple* isoform is overexpressed everywhere, polarity of the P  
95 compartment is completely reversed while the A compartment is normal (Lawrence et  
96 al., 2004). These results allow the hypothesis that Pk and Sple have similar basic  
97 functions (to turn around polarity): the local outcome depending on the distribution  
98 of both proteins and varied regional responses to them (Gubb and Garcia-Bellido,  
99 1982). For example, in the wildtype, Pk is found to be most effective in the wing, in  
100 the P compartment of the abdomen and the posterior part of the thorax while Sple is  
101 thought to predominate in the A compartment of the abdomen and anterior region of  
102 the thorax (Gubb et al., 1999; Ayukawa et al., 2014; Merkel et al., 2014; Ambegaonkar  
103 and Irvine, 2015).

### 104 (iv) Current views of the *pk* gene

105 It is widely thought that PCP is produced by three tiers of gene activity (Tree et al.,  
106 2002a; Tree et al., 2002b; Yang et al., 2002; Klein and Mlodzik, 2005; Strutt and Strutt,  
107 2005; Strutt and Strutt, 2007; Axelrod, 2009) in which gradients of activity of the  
108 protocadherins Dachous (Ds) and Fat (Ft) orient the Stan system which in turn  
109 orients effector functions. Recently it has been posited that the *pk* gene intervenes  
110 between the polarising information specified by the direction of the gradients of Ds/Ft  
111 activity and its interpretation by the Stan system. These articles (Hogan et al., 2011;  
112 Ayukawa et al., 2014; Olofsson et al., 2014; Ambegaonkar and Irvine, 2015) also  
113 support earlier conclusions that Pk and Sple act discordantly on polarity output in  
114 different tissues and have improved the evidence that changes in the levels of Pk  
115 and/or Sple can turn around the orientation of polarised structures (Ayukawa et al.,  
116 2014). Moreover, they highlight Sple as the main component of a molecular link  
117 between Ds/Ft and the Stan systems. Here we provide genetic evidence that questions  
118 these hypotheses: we conclude that Pk and Sple are not essential components of either  
119 system nor do they function as components of a link between the two systems. We  
120 add to evidence that the Ds/Ft system acts independently of the Stan system and  
121 provide data that Pk and Sple can rectify the output of the Ds/Ft system. Pk and Sple



122 also, separately, affect the output of the Stan system; they do not change the sign of  
123 polarisation but alter how far the polarising signal can spread.

## 124 RESULTS

### 125 Explaining terms and methods

126 We make genetically marked clones of cells of different genotypes to ask how the two  
127 different genetic systems, the Ds/Ft system and the Stan system, define cell polarity in  
128 the anterior (A) and posterior compartments (P) of the adult abdomen. We assay  
129 function of the Ds/Ft system by the ability of “sending cells” in clones that, say,  
130 overexpress *ft*, to change the polarity of “receiving cells” nearby the clone. As a result,  
131 hairs and bristles around the clones may point “inwards” or “outwards”, that is, in or  
132 away from the clone. For the Ds/Ft system, Ds, Ft and Dachs (D) are each essential;  
133 however removal of only Ds or Ft causes a misdistribution of the D protein in each  
134 cell (Ambegaonkar et al., 2012; Pan et al., 2013), leading to an adventitious phenotype  
135 of whorly polarity (Ambegaonkar et al., 2012; Lawrence and Casal, 2013). Therefore  
136 the cleanest way to break the Ds/Ft system completely and persuasively is to remove D  
137 as well as Ds or Ft. To break the Stan system we remove Stan; *stan*<sup>-</sup> cells cannot send  
138 or receive signals, for example *stan*<sup>-</sup> receiving cells cannot respond to cells that  
139 overexpress *fz* (Genotype 1) even when those sending cells also express *stan*  
140 (Lawrence et al., 2004; Casal et al., 2006). Using these functional assays we ask  
141 whether and how Pk and Sple cooperate with the Ds/Ft and the Stan systems.

142 [Figure 1](#) acts as a summary of, and a guide to, all the experiments and results.

### 143 Do the Ds/Ft and Stan systems act independently in both A and P 144 compartments?

145 There is a school of thought that upstream polarity information —given by the  
146 direction of slopes of gradients of Ds and Four-jointed (Fj) activity— is interpreted by  
147 the Stan system (Yang et al., 2002; Ma et al., 2003; Goodrich and Strutt, 2011;  
148 reviewed in Butler and Wallingford, 2017). Experiments in the adult abdomen showed  
149 that the non-autonomous effects on neighbouring cells by clones, for example, lacking  
150 *ft*, depended on the compartment. *ft*<sup>-</sup> clones in the A compartment made the  
151 surrounding cells point inwards towards the clone, while the same clones in the P  
152 compartment caused the surrounding cells to point outwards. We therefore argued  
153 that the gradient slopes of Ds and Fj activities might have different signs in the  
154 anterior (A) and the posterior (P) compartments (Casal et al., 2002). But if that were  
155 true then, because all the hairs point the same way (backwards) in the wildtype, hair  
156 polarity cannot be a direct readout of the gradient slope of the Ds/Ft system.

157 Experimental evidence provided a solution to this conundrum: perhaps Pk or Sple  
158 rectify the reading of a gradient in either the A or the P compartment so that all hairs  
159 point in the same direction (Lawrence et al., 2004). But, later experiments argued that  
160 the Stan system and the Ds/Ft system act independently of each other (Casal et al.,  
161 2006; Lawrence et al., 2007; Brittle et al., 2012) —implying that rectification due to Pk  
162 and/or Sple does not alter a direct input from the Ds/Ft system into the Stan system  
163 but avoids dissonance between their independent inputs into PCP.

#### 164 **(i) clones affecting the Ds/Ft system function when the Stan system is broken**

165 Clones overexpressing *ft* polarise both wildtype cells (Genotype 2) and cells in which  
166 the Stan system is broken —we used flies lacking *stan*, (Genotype 3) or, in the case of  
167 A clones, both *stan* and *fz* (Casal et al., 2006). In both cases the receiving cells tend to  
168 point hairs outwards from the clone in the A compartments (Casal et al., 2006) and  
169 inwards in the P compartments (Figure 2 and Figure 3). Consistent with these results,  
170 clones overexpressing the extracellular domain of Ds also polarise both wildtype cells  
171 (Genotype 4) and cells in which the Stan system is broken (*stan*<sup>-</sup> Genotype 5) inwards  
172 in the anterior portion of A compartments (Casal et al., 2002; Casal et al., 2006). These  
173 clones are ineffective in the posterior parts of A compartments and in P  
174 compartments (Figure S3), probably because the activity of Ds is normally high in  
175 these places (Casal et al., 2002).

#### 176 **(ii) clones affecting the Stan system function when the Ds/Ft system is broken**

177 Clones that overexpress *fz*, in either the A or P compartments, normally turn the  
178 polarity of receiving cells to point outwards from the clone in A (Casal et al., 2006)  
179 and also in P (Genotype 6, Figure S2). They do the same in *ds*<sup>-</sup> flies but with a longer  
180 range (Genotype 7; Adler et al., 1998; Ma et al., 2003; Casal et al., 2006; Figure S1).

181 These experiments have established that the two systems act independently; we  
182 now ask are Pk and Sple essential components of either the Ds/Ft or the Stan  
183 systems?

### 184 **How do Pk and Sple interact with each of the two systems?**

#### 185 **(i) evidence from epistasis**

186 *ds*<sup>-</sup> and *pk-sple*<sup>-</sup> flies differ in phenotype in the dorsal abdomen: the most useful  
187 difference is seen in the P compartment, where, in *ds*<sup>-</sup> flies, hairs in the anterior region  
188 of the P compartment are in whorls (probably due to the misdistribution of Dachs)  
189 but in its posterior part the hairs point directly anteriorward. By contrast, in *pk-sple*<sup>-</sup>  
190 flies, the entire P compartment has normal polarity (Lawrence et al., 2004). We find

191 that, in the abdomen, *ds<sup>-</sup> pk-sple<sup>-</sup>* flies (**Genotype 8**) are little different from *ds<sup>-</sup>* flies  
192 (**Figure 1**). It follows that the *ds* mutation is epistatic to a mutation that removes both  
193 *pk* and *sple* functions; a finding suggesting that the Pk gene acts entirely through the  
194 Ds/Ft system. However other results argue that Pk and Sple can act independently of  
195 the Ds/Ft system (see below). By contrast, when *pk-sple<sup>-</sup> stan<sup>-</sup>* flies are compared to  
196 each single mutant, they differ from both, having an additive phenotype (**Genotype 9**  
197 and **Genotype 10**, **Figure 1**). These results suggest that Pk and Sple act separately but  
198 differently on each of the two systems.

199 **(ii) The Stan system functions well, both in cells that lack *pk* and *sple* and in cells that**  
200 **have *pk* or *sple* overexpressed**

201 1. In *pk-sple<sup>-</sup>* flies. In the abdomen of *pk-sple<sup>-</sup>* flies (**Genotype 11**), polarity of most of  
202 the A compartment is reversed, but the P compartment is normal. Clones of cells that  
203 overexpress *fz* (**Genotype 12** or, alternatively, lack *fz*, **Genotype 13**) in such *pk-sple<sup>-</sup>*  
204 flies strongly polarise receiving cells in both A and P compartments; in both  
205 compartments the clones affect mutant receiving cells with the same sign as in  
206 wildtype receiving cells, that is outwards from the clones that overexpress *fz* and  
207 inwards towards clones that lack *fz*, independently of the prevailing polarity of the  
208 receiving cells (**Figure S2**). Thus, the Stan system does not need Pk or Sple to send  
209 polarity signals or to repolarise receiving cells (cf **Lawrence et al., 2004**).

210 2. When *pk* or *sple* are overexpressed. In flies in which either *sple* (**Genotype 14**) or *pk*  
211 (**Genotype 15**) are overexpressed, large areas of each abdominal segment show  
212 abnormal polarity. Nevertheless *fz<sup>-</sup>* clones polarise receiving cells of both  
213 compartments inwards —as they do in wildtype flies—, independently of the  
214 prevailing polarity of those receiving cells (**Figure 6**). All these results are mutually  
215 consistent: they show that polarity changes induced by the Stan system do not require  
216 products of the *pk* gene, showing that Pk and Sple are not essential components of the  
217 Stan system in the wildtype.

218 3. However, the *fz<sup>-</sup>* clones do not behave exactly as they would in a wildtype  
219 background: absence or excess of Pk and Sple change the amount of polarisation  
220 caused by clones with altered amounts of Fz. In A compartments of the abdomen,  
221 clones of cells that lack *fz* alter polarity of surrounding wildtype cells. The number of  
222 rows of receiving cells affected, the range, varies with the amount of Pk and/or Sple  
223 protein: in *pk-sple<sup>-</sup>* flies (**Genotype 13**) the range of polarisation due to *fz<sup>-</sup>* clones or  
224 excess *fz* (**Figure 4** in **Lawrence et al., 2004**) is increased, resembling the increase in  
225 range observed when *fz<sup>-</sup>* clones are induced in *ds<sup>-</sup>* flies (**Genotype 16**). Raising the  
226 level of Pk ubiquitously does not change that range (**Genotype 15**), while when Sple

227 levels are raised (**Genotype 14**), polarisation is reduced (**Figure S5**). In the P  
228 compartments, we detected no effects on range; either in *pk-sple*<sup>-</sup> flies or when the  
229 levels of either Pk or Sple were increased (**Figure S2** and **Figure S5**). These results add  
230 to evidence that the Stan system can function independently of Pk and Sple.

### 231 **(iii) Pk and Sple alter polarity even when the Stan system is broken**

232 Uniform overexpression of *pk* causes large changes of polarity in the abdomen of flies  
233 with a broken Stan system (*stan*<sup>-</sup>, **Genotype 17**) in the A compartment, without  
234 affecting the P compartment (**Figure 4**). While generalised overexpression of *sple* also  
235 affects the polarity of *stan*<sup>-</sup> flies, but altering the polarity of the P compartment of the  
236 abdomen, without much affecting the A compartment (**Figure 5**).

### 237 **(iv) Pk and Sple affect PCP even when the Ds/Ft system is broken**

238 1. General overexpression of *pk* or *sple* in a broken Ds/Ft system. If Pk and Sple acted  
239 exclusively on the Ds/Ft system, one would expect Pk and Sple proteins not to affect  
240 PCP if the Ds/Ft system were broken. But we find that ubiquitous overexpression of  
241 *pk* alters polarity of the A compartment (and part of the P compartment) of *ds*<sup>-</sup> *pk*-  
242 *sple*<sup>-</sup> (**Genotype 19**, **Figure 1**), *d*<sup>-</sup> (**Genotype 20**, **Figure S4**) and *ft*<sup>-</sup> *d*<sup>-</sup> flies (**Genotype**  
243 **21**, **Figure 4**). Similarly, general overexpression of *sple* affects the polarity of the P  
244 compartment of the abdomen of *ds*<sup>-</sup> *pk-sple*<sup>-</sup> (**Genotype 22**, **Figure 1**), *d*<sup>-</sup> (**Genotype 23**,  
245 **Figure S4**) and *ft*<sup>-</sup> *d*<sup>-</sup> flies (**Genotype 24**, **Figure 5**).

246 In *d*<sup>-</sup> flies, the A and P compartments are largely normal but a section of the P  
247 compartment is reversed, as in *ds*<sup>-</sup> (or *ft*<sup>-</sup>) flies. When ubiquitous Pk is added to *d*<sup>-</sup> or  
248 *ft*<sup>-</sup> *d*<sup>-</sup> flies, the anterior part of the A compartment is altered to point forwards and the  
249 reversed rear section of the P compartment is “rescued” so that it points backwards, as  
250 in the wildtype. Thus Pk affects both the A and the P compartment in these flies.  
251 However, unlike Pk, ubiquitous Sple affects *d*<sup>-</sup> and *ft*<sup>-</sup> *d*<sup>-</sup> flies differentially: in a *d*<sup>-</sup>  
252 background there is no change to the A compartment, but the whole P compartment  
253 is largely reversed. But, in a *ft*<sup>-</sup> *d*<sup>-</sup> background the anterior region of the A  
254 compartment points laterally and, as noted by Sharp and Axelrod (2016) the P  
255 compartment is rescued, having a normal orientation — thus Pk and Sple have similar  
256 effects on *ft*<sup>-</sup> *d*<sup>-</sup> but very different effects on *d*<sup>-</sup> flies. It follows from these findings that  
257 Ft has outputs that are independent of D and that these outputs are altered by Sple but  
258 not by Pk. Note that both Sple and Pk can rescue the reversed polarity in the P  
259 compartment in a completely broken Ds/Ft system (*ft*<sup>-</sup> *d*<sup>-</sup>) perhaps through their  
260 effects on the Stan system or, maybe, through other contributors to PCP (**Figure 4**,  
261 **Figure 5** and **Figure S4**).

262 2. Clones that overexpress *pk* or *sple* in a broken Ds/Ft system. We find that clones of  
263 cells overexpressing *sple* (Genotype 25; Lawrence et al., 2004) or *pk* (Genotype 26; data  
264 not shown), have small nonautonomous effects in the wildtype and, more so, in *ds*<sup>-</sup>  
265 flies (Genotype 27 and Genotype 28) where they polarise receiving cells to point  
266 strongly inwards (Figure 7). Perhaps these clones act via the Stan system? It is  
267 pertinent that both wing and abdominal cells that overexpress the *pk* gene accumulate  
268 Vang uniformly on the cell membrane (Bastock et al., 2003; Olofsson et al., 2014). If  
269 this were to happen in our experiments, then the clone could behave as if it were  
270 overexpressing Vang and should polarise surrounding cells inwards, as observed; this  
271 effect should be stronger in *ds*<sup>-</sup> than in *ds*<sup>+</sup> cells, also as observed. To test this  
272 hypothesis further we made *Vang*<sup>-</sup> clones that overexpressed *pk* (Genotype 29), as well  
273 as control *Vang*<sup>-</sup> clones (Genotype 30), in *ds*<sup>-</sup> flies. Both these types of clones behaved  
274 like *Vang*<sup>-</sup> clones in wildtype flies (Genotype 31), and could not be distinguished  
275 from each other, ie they polarise *ds*<sup>-</sup> receiving cells strongly outwards (Figure 7),  
276 confirming the hypothesis that cells overexpressing *pk* polarise cells because they  
277 accumulate Vang, a Stan system protein. Thus, overexpressing Pk interferes with the  
278 Stan system. These results show that Pk and Sple do have functions that are  
279 independent of the Ds/Ft system.

280 **(v) The Ds/Ft system functions well but abnormally, both in cells that lack Pk and Sple**  
281 **and in cells that have *pk* or *sple* overexpressed**

282 1. In *pk-sple*<sup>-</sup> flies. Clones of cells overexpressing *ft* repolarise receiving cells strongly,  
283 even if they lack Pk and Sple (Genotype 32). However it surprised us that in the  
284 largely reversed A compartment of the *pk-sple*<sup>-</sup> abdomen, the hairs around the clones  
285 point inwards (the opposite sign induced by such clones in the wildtype) and also  
286 inwards in the P compartment (the same sign as in wildtype, Figure 2). Clones  
287 overexpressing *ds* in *pk-sple*<sup>-</sup> flies (Genotype 33) act comparably, the hairs around  
288 such clones point outwards in A (the opposite sign induced by such clones in the  
289 wildtype) and outwards, but weakly, in the P compartment (the same sign as in  
290 wildtype, see Figure S3). Thus in clones of both genotypes, in the A compartments,  
291 the sign of the effect is the opposite from when such clones are made in the wildtype  
292 (Genotype 2 and Genotype 4). Nevertheless, in both these genotypes, in the P  
293 compartments, the sign of the polarising effect is the same as wildtype. Quantitation  
294 of overexpressing *ft* and *ds* clones confirms these results and also shows that these  
295 clones (in the A compartment) affect the polarity of both wildtype and *stan*<sup>-</sup> receiving  
296 cells (Genotype 5 and Genotype 3) to the same extent. They also affect *pk-sple*<sup>-</sup> *stan*<sup>+</sup>  
297 and *pk-sple*<sup>-</sup> *stan*<sup>-</sup> (Genotype 34 and Genotype 35) receiving cells with the same  
298 strength (Figure 3 and Figure S3). These results show that neither Pk, Sple nor Stan

299 are required for polarity signalling by the Ds Ft system, although Pk and Sple can  
300 change the sign of the response. They also show that Pk and Sple do not act as the  
301 link between the Ds/Ft system and the Stan system, because if they were an essential  
302 link, the removal of Pk and Sple would block effects on polarity caused by  
303 overexpressing *ft*.

304 2. In flies in which *pk* or *sple* are overexpressed. Clones that lack *ft* made in flies in  
305 which *pk* is generally overexpressed (Genotype 36) behave as follows: where the  
306 polarity of much of the surrounding background is reversed from normal, with the  
307 hairs pointing forwards (ie in the A compartment), *ft*<sup>-</sup> clones act with the opposite  
308 sign to that in the wildtype (Genotype 37) and hairs around the clone tend to point  
309 outwards (Figure 6). In the P compartment, where overexpression of *pk* produces no  
310 change to polarity, the *ft*<sup>-</sup> clones behave as they do in the wildtype, that is the hairs  
311 point outwards from the clone (Figure 6).

312 Clones that lack *ft* made in flies in which *sple* is generally overexpressed  
313 (Genotype 38) behave as follows: in the A compartment, which has normal polarity,  
314 these clones affect these receiving cells as they affect wildtype cells; hairs around the  
315 clone point inwards (Figure 6). In the P compartment, where the polarity of the  
316 surrounding background is reversed from normal with the hairs pointing forwards,  
317 the *ft*<sup>-</sup> clones now polarise receiving cells with the opposite sign to that in the  
318 wildtype, that is the hairs point inwards into the clone (Figure 6).

319 In the A compartment of the abdomen, clones that lack *ds* have effects of the  
320 opposite sign to *ft*<sup>-</sup> clones in both classes (see previous points 1 and 2) of experiments  
321 above —as would be expected. However *ds*<sup>-</sup> clones have little or no effect in the P  
322 compartment in all genotypes tested (data not shown, Genotype 39, Genotype 40 and  
323 Genotype 41).

324 3. These results show that the Ds/Ft system can function independently of Pk and Sple  
325 but that Pk and Sple can modulate the sign of its output. This dramatic effect could, in  
326 principle, be due to Pk and/or Sple affecting the patterns of expression of *ds*, and/or *fj*  
327 and thereby changing the orientation of the Ds/Ft system gradients. To test we studied  
328 the expression of enhancer traps for *ds* and *fj* loci in *pk-sple*<sup>-</sup> flies and saw no  
329 departure from the wildtype patterns (Genotype 43, Genotype 44, Genotype 45 and  
330 Genotype 46; Figure S6). It follows that Pk and Sple determine whether polarised  
331 structures in the cell, the hairs and bristles, point up or down the gradients of Ds and  
332 Fj.



## 333 DISCUSSION

334 Our aim is to understand the contribution of Pk and Sple to building planar cell  
335 polarity in the wildtype fly. The main results and conclusions are listed below.

### 336 **The Ds/Ft system and the Stan system act independently and are not** 337 **linked via Sple and/or Pk**

338 *ft*-overexpressing clones reorient wildtype receiving cells, outwards in the A  
339 compartment (Casal et al., 2006) and inwards in the P (this paper). These clones have  
340 the same effects on cells in which the Stan system of PCP is broken (for example in  
341 *stan*<sup>-</sup> flies; Figure 2, Figure 3 and Figure S3). It follows that polarisation cannot be due  
342 to any intracellular interaction between Stan and any component of the Ds/Ft system  
343 within the sending cells. However it could be argued that extra Ft in the sending cell,  
344 attracting Ds in the receiving cell, would, non-autonomously, influence some residual  
345 capability of the Stan system in the receiving *stan*<sup>3</sup>/*stan*<sup>E59</sup> cells to receive and  
346 propagate polarity to neighbouring cells. Yet, clones that overexpress both *fz* and *stan*  
347 (ie cells that have a fully functional Stan system) fail to repolarise *stan*<sup>3</sup>/*stan*<sup>E59</sup> cells  
348 (Casal et al., 2006). Thus the propagation of polarity change observed around cells  
349 that overexpress *ft* cannot be due to any non-autonomous effect on the Stan system.  
350 These results show that for both compartments of the abdomen, the Ds/Ft system acts  
351 independently of the Stan system (Casal et al., 2006; Lawrence et al., 2007; Lawrence,  
352 2011).

353 Here we make *stan*<sup>E59</sup> clones (*stan*<sup>E59</sup> introduces a premature stop codon in the  
354 ectodomain Usui et al., 1999) that overexpress *ft* or *ds* in *pk-sple*<sup>-</sup> *stan*<sup>3</sup>/*pk-sple*<sup>-</sup> *stan*<sup>E59</sup>  
355 flies; and show that these clones repolarise the receiving cells. This polarisation cannot  
356 depend on Pk and Sple intervening, inside the cells of the clone, between the Ds/Ft  
357 and the Stan systems because these sending cells lack the *stan* and *prickle* genes  
358 completely while the host flies lack the *prickle* gene and any functional Stan (see  
359 previous paragraph). Our finding conflicts with current models in which the *pk* gene  
360 products are proposed to link the two systems of PCP (Hogan et al., 2011; Ayukawa et  
361 al., 2014; Merkel et al., 2014; Olofsson et al., 2014; Ambegaonkar and Irvine, 2015).

362 Another argument is relevant here: if polarisation induced by clones affecting  
363 the Ds/Ft system were to act through and depend on the Stan system via a molecular  
364 link of Pk and or Sple, then we would expect the polarising output from Stan system  
365 clones (eg from *fz*<sup>-</sup> clones) to be different in sign, depending on the presence or  
366 absence of that Pk/Sple link (cf Figure 7 in Ayukawa et al., 2014). However, this is not  
367 the case (Figure S2E and Figure S2F).



## 368 **Pk/Sple act independently of the Stan system**

369 Loss of the *pk* gene or overexpressing the Pk isoform reverses polarity of most of the A  
370 compartment, having strong effects even in flies with a broken Stan system (*stan*<sup>-</sup>)  
371 Similarly, overexpressing Sple reverses polarity in the P compartment in *stan*<sup>-</sup> flies; it  
372 follows that Pk and Sple can act independently of the Stan system. This does not fit  
373 easily with the current view that Pk functions as part of the Stan system, for example  
374 the lack of requirement for the *pk* gene contrasts with a strong requirement for the  
375 other key Stan system genes (eg Fz, Stan or Vang) in the receiving cells (Taylor et al.,  
376 1998; Lawrence et al., 2004; Strutt and Strutt, 2007; Strutt and Warrington, 2008;  
377 Struhl et al., 2012).

378 Remember that the Stan system proteins Stan, Fz, Vang and Pk are all  
379 preferentially localised to specific regions of the cell membrane and this is considered  
380 to be important for their functions in PCP. Nevertheless, *pk-sple*<sup>-</sup> receiving cells, in  
381 which Stan, Fz and Vang are now not visibly localised (reviewed in Strutt, 2009), can  
382 respond at least as well to such sending cells as **wild type** ones (Adler et al., 2000;  
383 Lawrence et al., 2004). This dilemma might resolve if the observed asymmetry were  
384 not so directly related to function as has been assumed and were more a consequence  
385 than a cause of polarity (Lawrence et al., 2004).

## 386 **Pk and Sple modulate the Ds/Ft system, determining the polarity of its** 387 **output**

388 Sending cells that overexpress *ds* or *ft*, or lack *ds* or *ft*, change the polarity of receiving  
389 cells, even in the absence of Pk and Sple— these proteins cannot be necessary for the  
390 Ds/Ft system to function and propagate polarity from cell to cell. However the sign of  
391 this change depends on whether the receiving cells contain, lack or overexpress  
392 products of the *pk* gene. These results show that the Pk and Sple can alter the sign of  
393 polarisation that is produced by the Ds/Ft system. But, how do Pk and Sple have their  
394 effects on polarity? It appears that the sign of polarisation depends on the relative  
395 amounts of Pk and Sple in a particular region of the fly (Gubb et al., 1999; Ayukawa et  
396 al., 2014). One model is that the Ds/Ft proteins might act through Pk and Sple to bias  
397 the orientation of microtubules and these might affect PCP by transporting Stan  
398 system components preferentially to one side of the cell (Harumoto et al., 2010; Matis  
399 et al., 2014; Olofsson et al., 2014). But, the correlation between microtubule  
400 orientation and PCP is inconsistent (Harumoto et al., 2010; Sharp and Axelrod, 2016)  
401 leading to doubts about the validity of the hypothesis (Ambegaonkar and Irvine,  
402 2015). Also, this model is now contradicted by our results, which show that abnormal  
403 amounts of Ds, Ft, Sple or Pk can all affect PCP even when the Stan system is broken.

404 A diagram suggesting how the *pk* gene might fit into the organisation of PCP is  
405 given in [Figure 8](#).

## 406 **The functions of Pk and Sple**

407 It has been suggested that Pk and Sple do fundamentally different things ([Ayukawa et](#)  
408 [al., 2014](#); [Ambegaonkar and Irvine, 2015](#)); however our findings fit better with the  
409 view that the two isoforms have similar molecular functions and the differences  
410 between them are due to their expression in different patterns ([Gubb et al., 1999](#)).  
411 Indeed, in the results (section **v**) where we study the behaviour of *ft*<sup>-</sup> or *ft*-expressing  
412 clones we found that removal of Pk and Sple or ubiquitous expression of either can  
413 eliminate any differences in responses between the A and the P compartment cells.

414 It might appear that Pk can act in only the A compartment and Sple in the P,  
415 but it cannot be so simple, for the universal expression of either Pk or Sple can rescue  
416 the reverted polarity at the back of the P compartment in *ft*<sup>-</sup> *d*<sup>-</sup> flies ([Figure 4](#)). Also,  
417 when *sple* is generally overexpressed in *ft*<sup>-</sup> *d*<sup>-</sup> flies, polarity of the anterior region of the  
418 A compartment is considerably altered ([Figure 5](#)). Looking at the P compartment the  
419 action of Pk appears to be independent of an intact Ds/Ft system, but the effects of  
420 Sple in the P compartment depend on whether the background genotype is *d*<sup>-</sup> or *ft*<sup>-</sup> *d*<sup>-</sup>  
421 ([Figure S4](#)). Part of this difference could be due to specific binding occurring between  
422 Sple and Ds but not between Pk and Ds ([Ambegaonkar and Irvine, 2015](#)). To explain:  
423 in *d*<sup>-</sup>, Ds protein will be localised and able to interact with both Ft and Sple, while, in  
424 *ft*<sup>-</sup> *d*<sup>-</sup>, any interaction between Ds and Sple cannot affect binding between Ds and Ft.  
425 However [Ayukawa et al. \(2014\)](#) find that both Sple and Pk bind to each other and to D  
426 (but not to Ds), suggesting the situation is more complex.

427 But why are the Pk and Sple proteins asymmetrically localised in the cell? Part of  
428 the answer could be that Pk and Sple work with and/or bind to components of the  
429 Ds/Ft system which are themselves asymmetrically localised. ([Ayukawa et al., 2014](#);  
430 [Ambegaonkar and Irvine, 2015](#)). But this cannot be all of the answer as Pk is not  
431 properly localised in *stan*<sup>-</sup> cells ([Tree et al., 2002b](#)), in which Ds and Ft are,  
432 presumably, normally localised.

433 How can we understand the effect of Pk and Sple on the Stan system,  
434 particularly on range? In the A compartment, a high level of Sple reduces polarity  
435 changes induced by *fz*<sup>-</sup> clones, while the loss of the *pk* gene increases their range. One  
436 explanation could depend on Sple and Pk (or the lack of these proteins) acting on the  
437 Ds/Ft system —if they made the polarity induced by Ds/Ft in the cells more (or less)  
438 robust it would make it more difficult (or easier) for clones affecting the Stan system  
439 to alter PCP. Another explanation could relate to some direct effect of Pk (and Sple)

440 on Vang (Bastock et al., 2003) which fits our observations with clones overexpressing  
441 Pk (Figure 7). The function of Vang in the Stan system is somewhat unclear; like Pk,  
442 Vang is present in larger than stoichiometric amounts in relation to the two molecules  
443 that form the intercellular bridge, Stan and Fz (Strutt et al., 2016), yet affects bridge  
444 function (Struhl et al., 2012). The abdominal phenotypes of *Vang*<sup>-</sup> and *pk-sple*<sup>-</sup> are  
445 somewhat similar, both having areas of reversed polarity (Lawrence et al., 2004),  
446 suggesting a commonality of function. Indeed there is a recent model proposing that  
447 Pk acts on the stability of Fz intracellularly (via Dsh) and in the adjacent cell (via  
448 Vang); the former effect may involve endocytosis (Warrington et al., 2017). Our  
449 experiments argue that the function of Pk is not limited to the Stan system but  
450 includes, independently, the Ds/Ft system. In any case we have no explanation for the  
451 lack of apparent effects of Pk and Sple on the range of *fz*<sup>-</sup> clones in the P  
452 compartment.

453 What could be the purpose of such complexity? In *Drosophila* the consistent  
454 orientation of the wing hairs may have led to an oversimplified and idealised picture.  
455 Elsewhere, the presentation of PCP is more complex: consider the mixed orientation  
456 of rows of hairs and denticles on the *Drosophila* larva, differing dorsally and ventrally,  
457 or, in mammals, the startlingly diverse orientation of stereocilia in the vestibular  
458 system, or the complex patterns of hair orientation on the skin. Two separate genetic  
459 systems which generate polarity by reading the slopes of morphogen gradients, plus  
460 Pk and Sple to modulate output in different parts of the body, could generate much of  
461 this flexibility in PCP.

## 462 **Conclusion**

463 Our experiments argue that Pk and Sple are not essential components of either the  
464 Ds/Ft or the Stan systems. We have shown that they do not function as a link between  
465 the two systems. Instead, Pk and Sple appear to modulate the polarity outputs of both  
466 the Ds/Ft system and the Stan system with the most conspicuous effects on the  
467 former. Both these systems are different in their components but similar in their logic;  
468 both utilise intercellular molecular bridges that become distributed asymmetrically  
469 within each cell. Pk and Sple could help produce this asymmetry— perhaps via a  
470 generic function in cell biology whose mechanism is still undescribed.

## 471 **MATERIALS AND METHODS**

### 472 **Mutations and transgenes**

473 The FlyBase (Gramates et al., 2017) entries for relevant mutations and transgenes are  
474 the following: *tub.Gal4*: *Scer*\GAL4<sup>alphaTub84B.PL</sup>. *tub.Gal80*: *Scer*\GAL80<sup>alphaTub84B.P</sup>.

475 *UAS.ectoDs: ds<sup>ecto.Scer\UAS</sup>. UAS.ft: ft<sup>Scer\UAS.cMa</sup>. UAS.fz : fz<sup>Scer\UAS.cSa</sup>. UAS.pk: pk<sup>Scer\UAS.cGa</sup>.*  
476 *UAS.sple: pk<sup>sple.Scer\UAS</sup>. ck<sup>UAH21</sup>. d<sup>GC13</sup>. ds<sup>UA071</sup> and ds<sup>2D60b</sup>. fjp<sup>1</sup>. ft<sup>8</sup> and ft<sup>G-rv</sup>. fz<sup>15</sup>. pk<sup>pk-sple-13</sup>.*  
477 *pwn<sup>1</sup>. sha<sup>1</sup>. stan<sup>3</sup> and stan<sup>E59</sup>. trc<sup>1</sup>.*

## 478 **Experimental Genotypes**

479 **Genotype 1: *UAS.fz* clones in *stan*<sup>-</sup> flies:** *y w hs.FLP; FRT42D tub.Gal80 stan<sup>3</sup>*  
480 *hs.CD2, y<sup>+</sup>/ FRT42D pwn stan<sup>E59</sup>; UAS.fz/ tub.Gal4*

481 **Genotype 2: *UAS.ft* clones in wild type flies:** *y w hs.FLP tub.Gal4 UAS.nls-GFP/ y*  
482 *w hs.FLP; d<sup>GC13</sup> FRT42D pwn sha/ d<sup>GC13</sup> FRT42D tub.Gal80, y<sup>+</sup>; UAS.ft/+*

483 **Genotype 3: *UAS.ft* clones in *stan*<sup>-</sup> flies:** *y w hs.FLP; FRT42D pwn stan<sup>E59</sup> sha/*  
484 *FRT42D tub.Gal80 stan<sup>3</sup> hs.CD2, y<sup>+</sup>; UAS.ft/ tub.Gal4*

485 **Genotype 4: *UAS.ectoDs* clones in wild type flies:** *y w hs.FLP tub.Gal4 UAS.nls-*  
486 *GFP/ y w hs.FLP; FRT42D pwn stan<sup>E59</sup> sha/ FRT42D tub.Gal80;*  
487 *UAS.ectoDs/ +*

488 **Genotype 5: *UAS.ectoDs* clones in *stan*<sup>-</sup> flies:** *y w hs.FLP; FRT42D pwn stan<sup>E59</sup> sha/*  
489 *FRT42D tub.Gal80 stan<sup>3</sup> hs.CD2y<sup>+</sup>; UAS.ectoDs/ tub.Gal4*

490 **Genotype 6: *UAS.fz* clones in wild type flies:** *y w hs.FLP; FRT42D pwn/ FRT42D*  
491 *tub.G80, y<sup>+</sup>; tub.Gal4/ UAS.fz*

492 **Genotype 7: *UAS.fz* clones in *ds*<sup>-</sup> flies:** *y w hs.FLP tub.Gal4 UAS.nls-GFP/ y w*  
493 *hs.FLP; ds<sup>UA071</sup> FRT42D pwn/ ds<sup>UA071</sup> FRT42D tub.Gal80; UAS.fz*  
494 *hs.CD2, y<sup>+</sup> +*

495 **Genotype 8: *ds*<sup>-</sup> *pk*<sup>-</sup> *sple*<sup>-</sup> flies:** *y w hs.FLP; ds<sup>UA071</sup> pk<sup>pk-sple-13</sup>; UAS.sple/ TM2*

496 **Genotype 9: *pk*<sup>-</sup> *sple*<sup>-</sup> *stan*<sup>-</sup> flies:** *y w hs.FLP tub.Gal4 UAS.nls-GFP; FRT42D*  
497 *pk<sup>pk-sple-13</sup> stan<sup>3</sup> tub.Gal80/ FRT42D pk<sup>pk-sple-13</sup> stan<sup>E59</sup> sha; MRS/ TM2*

498 **Genotype 10: *stan*<sup>-</sup> flies:** *y w hs.FLP; FRT42D tub.Gal80 stan<sup>3</sup> hs.CD2, y<sup>+</sup>/ FRT42D*  
499 *pwn stan<sup>E59</sup>; MRS/ TM2*

500 **Genotype 11: *pk*<sup>-</sup> *sple*<sup>-</sup> flies:** *pk<sup>pk-sple-13</sup>*

501 **Genotype 12: *UAS.fz* clones in *pk*<sup>-</sup> *sple*<sup>-</sup> flies:** *y w hs.FLP tub.Gal4 UAS.nls-GFP/ y w*  
502 *hs.FLP; FRT42D pk<sup>pk-sple-13</sup> sha/ FRT42D pk<sup>pk-sple-13</sup> tub.Gal80; UAS.fz fz<sup>15</sup>*  
503 *fz2<sup>C1</sup> FRT2A/ +*

504 **Genotype 13: *fz* clones in *pk*<sup>-</sup> *sple*<sup>-</sup> flies:** *y w hs.FLP122; FRT42D pk<sup>pk-sple-13</sup>/ CyO;*  
505 *fz[P21] trc FRT2A/ tub.Gal80 FRT2A*

- 506 **Genotype 14: *fz* clones in *tub.Gal4 UAS.sple* flies:** *y w hs.FLP tub.Gal4 UAS.nls-*  
507 *GFP/ w; UAS.sple/ +; UAS.sple; fz<sup>15</sup> trc<sup>C1</sup> FRT2A / hs.GFPw<sup>+</sup> hs.CD2, y<sup>+</sup>*  
508 *ri FRT2A*
- 509 **Genotype 15: *fz* clones in *tub.Gal4 UAS.pk* flies:** *y w hs.FLP tub.Gal4 UAS.nls-GFP/*  
510 *w; UAS.pk/ +; UAS.sple; fz<sup>15</sup> trc<sup>C1</sup> FRT2A / hs.GFPw<sup>+</sup> hs.CD2, y<sup>+</sup> ri*  
511 *FRT2A*
- 512 **Genotype 16: *fz* clones in *ds<sup>-</sup>* flies:** *ds<sup>UA071</sup> FRT39/ ds<sup>33k</sup> bw<sup>V1</sup>; fz<sup>H51</sup> trc<sup>C1</sup> ri FRT2A/*  
513 *hs.CD2, y<sup>+</sup> hs.GFP ri FRT2A/ TM3*
- 514 **Genotype 17: *stan<sup>-</sup> tub.Gal4 UAS.pk* flies:** *y w hs.FLP tub.Gal4 UAS.nls-GFP/ y w*  
515 *hs.FLP; FRT42D pwn stan<sup>E59</sup> sha/ FRT42D stan<sup>3</sup>; UAS.pk/ TM2*
- 516 **Genotype 18: *stan<sup>-</sup> tub.Gal4 UAS.sple* flies:** *y w hs.FLP tub.Gal4 UAS.nls-GFP/ y w*  
517 *hs.FLP; FRT42D pwn stan<sup>E59</sup> sha/ FRT42D stan<sup>3</sup>; UAS.sple/ TM2*
- 518 **Genotype 19: *ds<sup>-</sup> pk<sup>-</sup> sple<sup>-</sup> tub.Gal4 UAS.pk* flies:** *y w hs.FLP tub.Gal4 UAS.nls-GFP/*  
519 *y w hs.FLP; ds<sup>UA071</sup> pk<sup>pk-sple-13</sup>; UAS.pk/ TM2*
- 520 **Genotype 20: *d<sup>-</sup> tub.Gal4 UAS.pk* flies:** *y w hs.FLP tub.Gal4 UAS.nls-GFP/ y w*  
521 *hs.FLP; d<sup>GCI3</sup> pr cn/ ft<sup>G-rv</sup> d<sup>GCI3</sup> FRT40; UAS.pk/ +*
- 522 **Genotype 21: *ft<sup>-</sup> d<sup>-</sup> tub.Gal4 UAS.pk* flies:** *y w hs.FLP tub.Gal4 UAS.nls-GFP/ y w*  
523 *hs.FLP; ft<sup>8</sup> d<sup>GCI3</sup> FRT40A/ ft<sup>G-rv</sup> d<sup>GCI3</sup> FRT40A; UAS.sple/ +*
- 524 **Genotype 22: *ds<sup>-</sup> pk<sup>-</sup> sple<sup>-</sup> tub.Gal4 UAS.sple* flies:** *y w hs.FLP tub.Gal4 UAS.nls-*  
525 *GFP/ y w hs.FLP; ds<sup>UA071</sup> pk<sup>pk-sple-13</sup>; UAS.sple/ TM2*
- 526 **Genotype 23: *d<sup>-</sup> tub.Gal4 UAS.sple* flies:** *y w hs.FLP tub.Gal4 UAS.nls-GFP/ w; ft<sup>G-rv</sup>*  
527 *d<sup>GCI3</sup>/ d<sup>GCI3</sup> pr cn; UAS.sple/ +*
- 528 **Genotype 24: *ft<sup>-</sup> d<sup>-</sup> tub.Gal4 UAS.sple* flies:** *y w hs.FLP tub.Gal4 UAS.nls-GFP/ y w*  
529 *hs.FLP; ft<sup>8</sup> d<sup>GCI3</sup> FRT40A/ ft<sup>G-rv</sup> d<sup>GCI3</sup> FRT40A; UAS.sple/ +*
- 530 **Genotype 25: *UAS.sple* clones in wild type flies:** *y w hs.FLP tub.Gal4 UAS.nls-GFP/*  
531 *y w hs.FLP; FRT42D pwn/ FRT42D tub.Gal80; UAS.sple/ +*
- 532 **Genotype 26: *UAS.pk* clones in wild type flies:** *y w hs.FLP tub.Gal4 UAS.nls-GFP/ y*  
533 *w hs.FLP; FRT42D pwn/ FRT42D tub.Gal80; UAS.pk/ +*
- 534 **Genotype 27: *UAS.sple* clones in *ds<sup>-</sup>* flies:** *y w hs.FLP tub.Gal4 UAS.nls-GFP/ y w*  
535 *hs.FLP; ds<sup>UA071</sup> ck<sup>UAh21</sup> FRT40A/ ds<sup>UA071</sup> tub.Gal80 FRT40A; UAS.sple/*  
536 *MRS*

- 537 **Genotype 28: UAS.pk clones in  $ds^-$  flies:** *y w hs.FLP tub.Gal4 UAS.nls-GFP/ y w*  
538 *hs.FLP; ds<sup>UA071</sup> ck<sup>UAh21</sup> FRT40A/ ds<sup>UA071</sup> tub.Gal80 FRT40A; UAS.pk/*  
539 *MRS*
- 540 **Genotype 29: Vang<sup>-</sup> UAS.pk clones in  $ds^-$  flies:** *y w hs.FLP tub.Gal4 UAS.nls-GFP/ y*  
541 *w hs.FLP; ds<sup>UA071</sup> FRT42D tub.Gal80/ ds<sup>UA071</sup> hs.CD2, y<sup>+</sup> FRT42D pwn*  
542 *Vang<sup>stbm-6</sup> sha; UAS.pk/ +*
- 543 **Genotype 30: Vang<sup>-</sup> clones in  $ds^-$  flies:** *y w hs.FLP; ds<sup>UA071</sup> FRT42D tub.Gal80/*  
544 *ds<sup>UA071</sup> hs.CD2, y<sup>+</sup> FRT42D pwn Vang<sup>stbm-6</sup> sha; UAS.pk/ +*
- 545 **Genotype 31: Vang<sup>-</sup> clones in wild type flies:** *y/ y hs.FLP; FRT42D pwn Vang<sup>stbm-6</sup>*  
546 *FRT42D hs.CD2, y<sup>+</sup>*
- 547 **Genotype 32: UAS.ft clones in  $pk^-sple^-$  flies:** *y w hs.FLP122 tub.gal4 UAS.nls-GFP/ y*  
548 *w hs.FLP; FRT42D pk<sup>pk-sple-13</sup> sha/ FRT42D pk<sup>pk-sple-13</sup> tub.Gal80/ UAS.ft/ +*
- 549 **Genotype 33: UAS.ectoDs clones in  $pk^-sple^-$  flies:** *y w hs.FLP122 tub.gal4 UAS.nls-*  
550 *GFP/ y w hs.FLP; FRT42D pk<sup>pk-sple-13</sup> sha/ FRT42D pk<sup>pk-sple-13</sup> tub.Gal80/*  
551 *UAS.ectoDs/ +*
- 552 **Genotype 34: UAS.ectoDs clones in  $pk^-sple^- stan^-$  flies:** *y w hs.FLP tub.Gal4*  
553 *UAS.nls-GFP/ y w hs.FLP; FRT42D pk<sup>pk-sple-13</sup> stan<sup>3</sup> tub.Gal80, y<sup>+</sup>/ FRT42*  
554 *pk<sup>pk-sple-13</sup> stan<sup>E59</sup> sha ; UAS.ectoDs/ +*
- 555 **Genotype 35: UAS.ft clones in  $pk^-sple^- stan^-$  flies:** *y w hs.FLP tub.Gal4 UAS.nls-*  
556 *GFP/ y w hs.FLP122; FRT42D pk<sup>pk-sple-13</sup> stan<sup>3</sup> tub.Gal80, y<sup>+</sup>/ FRT42D*  
557 *pk<sup>pk-sple-13</sup> stan<sup>E59</sup> sha ; UAS.ft/ +*
- 558 **Genotype 36: ft<sup>-</sup> clones in tub.Gal4 UAS.pk flies:** *y w hs.FLP tub.Gal4 UAS.GFP-nls/*  
559 *y; ft<sup>15</sup> stc FRT39/ FRT39; UAS.pk/ +*
- 560 **Genotype 37: ft<sup>-</sup> clones in wild type flies:** *y w hs.FLP; ft<sup>15</sup> stc FRT39/ FRT39*
- 561 **Genotype 38: ft<sup>-</sup> clones in tub.Gal4 UAS.sple flies:** *y w hs.FLP tub.Gal4 UAS.GFP-*  
562 *nls/ y; ft<sup>15</sup> stc FRT39/ FRT39; UAS.sple/ +*
- 563 **Genotype 39:  $ds^-$  clones in tub.Gal4 UAS.sple flies:** *w hs.FLP tub.Gal4 UAS.nls-GFP;*  
564 *ds<sup>UA071</sup> ck<sup>UAh21</sup> FRT40A/ FRT40A; UAS.sple/ +*
- 565 **Genotype 40:  $ds^-$  clones in tub.Gal4 UAS.pk flies:** *w hs.FLP tub.Gal4 UAS.nls-GFP;*  
566 *ds<sup>UA071</sup> ck<sup>UAh21</sup> FRT40A/ FRT40A; UAS.pk/ +*



567 **Genotype 41: *ds<sup>-</sup>* clones in wild type flies:** *y w hs.FLP/ +; ds<sup>UA071</sup> ck<sup>UAh21</sup> FRT40A/*  
568 *Dp(1;2)sc<sup>19</sup> w<sup>+30c</sup> FRT40A*

569 **Genotype 42: Control clones in *pk<sup>-</sup>sple<sup>-</sup> stan<sup>-</sup>* flies:** *y w hs.FLP tub.Gal4 UAS.nls-*  
570 *GFP/ y w hs.FLP; FRT42D pk<sup>pk-sple-13</sup> stan<sup>E59</sup> sha/ FRT42Dpk<sup>pk-sple-13</sup> stan<sup>3</sup>*  
571 *tub.Gal80, y<sup>+</sup>; MRS/ +*

572 **Genotype 43: *ds.lacZ* flies:** *y hs.FLP/ +; ds<sup>2D60b</sup> FRT42D pk<sup>pk-sple-13</sup>/ +*

573 **Genotype 44: *ff.lacZ* flies:** *y hs.FLP/ +; FRT42D pk<sup>pk-sple-13</sup> ff<sup>P1</sup>/ +*

574 **Genotype 45: *ds.lacZ pk<sup>-</sup>sple<sup>-</sup>* flies:** *y hs.FLP/ +; ds<sup>2D60b</sup> FRT42D pk<sup>pk-sple-13</sup>/ FRT42D*  
575 *pk<sup>pk-sple-13</sup>*

576 **Genotype 46: *pk<sup>-</sup>sple<sup>-</sup> ff.lacZ* flies:** *y hs.FLP/ +; FRT42D pk<sup>pk-sple-13</sup> ff<sup>P1</sup>/ FRT42D*  
577 *FRT42D pk<sup>pk-sple-13</sup>*

## 578 **Clone induction and microscopy**

579 Clones were induced by heat shocking third instar larvae for 1 hr at 34°C. Adult  
580 abdominal cuticles were studied as before (e.g., Lawrence et al., 2004; Casal et al.,  
581 2006).

## 582 **Quantitation**

583 Individual hairs along the entire perimeter of each clone (about 60-100 hairs per  
584 clone) were each scored as pointing largely into, outwards or parallel to the clone.  
585 Parallel hairs, which averaged 8% of the hairs, were counted; half was added equally to  
586 the inwards and outwards sets. The average orientation is then found for each clone  
587 (between 10 and 20 clones per genotype).

588 For range measurements, for each clone (n=20) the maximum extent in cell rows  
589 of the induced polarity changes was measured. The observer was blinded as to  
590 genotypes; he chose clones located in the middle of the A compartment and the  
591 middle or rear of the hairy region of the P compartment; small clones were avoided.  
592 Statistical analysis and graphics were performed in R using standard packages (R Core  
593 Team, 2016) and the *reshape* and *ggplot* packages (Wickham, 2007, 2009).

## 594 **ACKNOWLEDGEMENTS**

595 We thank the Department of Zoology, the Wellcome (WT096645MA and  
596 WT107060MA) for generous support, Malcolm Burrows for encouragement, and  
597 Gary Struhl and David Strutt for stocks and constructive criticisms.



598 **REFERENCES**

- 599 Adler, P.N. (2012). The *frizzled/stan* pathway and planar cell polarity in the  
600 *Drosophila* wing. *Curr. Top. Dev. Biol.* 101, 1-31.
- 601 Adler, P.N., Charlton, J., and Liu, J. (1998). Mutations in the cadherin superfamily  
602 member gene *dachsous* cause a tissue polarity phenotype by altering *frizzled* signaling.  
603 *Development* 125, 959-968.
- 604 Adler, P.N., Taylor, J., and Charlton, J. (2000). The domineering non-autonomy of  
605 *frizzled* and *van Gogh* clones in the *Drosophila* wing is a consequence of a disruption  
606 in local signaling. *Mech. Dev.* 96, 197-207.
- 607 Ambegaonkar, A.A., and Irvine, K.D. (2015). Coordination of planar cell polarity  
608 pathways through Spiny-legs. *eLife* 4.
- 609 Ambegaonkar, A.A., Pan, G., Mani, M., Feng, Y., and Irvine, K.D. (2012). Propagation  
610 of Dachsous-Fat planar cell polarity. *Curr. Biol.* 22, 1302-1308.
- 611 Axelrod, J.D. (2009). Progress and challenges in understanding planar cell polarity  
612 signaling. *Semin. Cell Dev. Biol.* 20, 964-971.
- 613 Ayukawa, T., Akiyama, M., Mummery-Widmer, J.L., Stoeger, T., Sasaki, J., Knoblich,  
614 J.A., Senoo, H., Sasaki, T., and Yamazaki, M. (2014). Dachsous-dependent asymmetric  
615 localization of spiny-legs determines planar cell polarity orientation in *Drosophila*.  
616 *Cell Rep.* 8, 610-621.
- 617 Bastock, R., Strutt, H., and Strutt, D. (2003). Strabismus is asymmetrically localised  
618 and binds to Prickle and Dishevelled during *Drosophila* planar polarity patterning.  
619 *Development* 130, 3007-3014.
- 620 Brittle, A.L., Thomas, C., and Strutt, D. (2012). Planar polarity specification through  
621 asymmetric subcellular localization of Fat and Dachsous. *Curr. Biol.* 22, 907-914.
- 622 Butler, M.T., and Wallingford, J.B. (2017). Planar cell polarity in development and  
623 disease. *Nat. Rev. Mol. Cell Biol.* 18, 375-388.
- 624 Casal, J., Lawrence, P.A., and Struhl, G. (2006). Two separate molecular systems,  
625 Dachsous/Fat and Starry night/Frizzled, act independently to confer planar cell  
626 polarity. *Development* 133, 4561-4572.

- 627 Casal, J., Struhl, G., and Lawrence, P.A. (2002). Developmental compartments and  
628 planar polarity in *Drosophila*. *Curr. Biol.* *12*, 1189-1198.
- 629 Goodrich, L.V., and Strutt, D. (2011). Principles of planar polarity in animal  
630 development. *Development* *138*, 1877-1892.
- 631 Gramates, L., Marygold, S., dos Santos, G., Urbano, J.-M., Antonazzo, G., Matthews,  
632 B., Rey, A., Tabone, C., Crosby, M., Emmert, D., *et al.* (2017). FlyBase at 25: looking to  
633 the future. *Nucleic Acids Res.* *45*, D663-D671.
- 634 Gubb, D., and Garcia-Bellido, A. (1982). A genetic analysis of the determination of  
635 cuticular polarity during development in *Drosophila melanogaster*. *J. Embryol. Exp.*  
636 *Morph.* *68*, 37-57.
- 637 Gubb, D., Green, C., Huen, D., Coulson, D., Johnson, G., Tree, D., Collier, S., and  
638 Roote, J. (1999). The balance between isoforms of the prickle LIM domain protein is  
639 critical for planar polarity in *Drosophila* imaginal discs. *Genes Dev.* *13*, 2315-2327.
- 640 Harumoto, T., Ito, M., Shimada, Y., Kobayashi, T.J., Ueda, H.R., Lu, B., and Uemura,  
641 T. (2010). Atypical cadherins Dachous and Fat control dynamics of noncentrosomal  
642 microtubules in planar cell polarity. *Dev. Cell* *19*, 389-401.
- 643 Hogan, J., Valentine, M., Cox, C., Doyle, K., and Collier, S. (2011). Two *frizzled* planar  
644 cell polarity signals in the *Drosophila* wing are differentially organized by the  
645 *fat/dachsous* pathway. *PLoS Genet* *7*, e1001305.
- 646 Ives, P. (1947). [New mutants report.]. *Drosophila Information Service* *21*, 68-69.
- 647 Klein, T.J., and Mlodzik, M. (2005). Planar Cell Polarization: An Emerging Model  
648 Points in the Right Direction. *Ann. Rev. Cell Dev. Biol.* *23*, 23.
- 649 Lawrence, P.A. (2011). Planar cell polarity Fashioning solutions. *Fly* *5*, 126-128.
- 650 Lawrence, P.A., and Casal, J. (2013). The mechanisms of planar cell polarity, growth  
651 and the Hippo pathway: Some known unknowns. *Dev. Biol.* *377*, 1-8.
- 652 Lawrence, P.A., Casal, J., and Struhl, G. (2004). Cell interactions and planar polarity in  
653 the abdominal epidermis of *Drosophila*. *Development* *131*, 4651-4664.
- 654 Lawrence, P.A., Struhl, G., and Casal, J. (2007). Planar cell polarity: one or two  
655 pathways? *Nature Reviews. Genetics* *8*, 555-563.

- 656 Ma, D., Yang, C.H., McNeill, H., Simon, M.A., and Axelrod, J.D. (2003). Fidelity in  
657 planar cell polarity signalling. *Nature* 421, 543-547.
- 658 Matis, M., Russler-Germain, D.A., Hu, Q., Tomlin, C.J., and Axelrod, J.D. (2014).  
659 Microtubules provide directional information for core PCP function. *eLife* 3.
- 660 Merkel, M., Sagner, A., Gruber, F.S., Etournay, R., Blasse, C., Myers, E., Eaton, S., and  
661 Julicher, F. (2014). The balance of prickle/spiny-legs isoforms controls the amount of  
662 coupling between core and *fat* PCP systems. *Curr. Biol.* 24, 2111-2123.
- 663 Olofsson, J., Sharp, K.A., Matis, M., Cho, B., and Axelrod, J.D. (2014). Prickle/spiny-  
664 legs isoforms control the polarity of the apical microtubule network in planar cell  
665 polarity. *Development* 141, 2866-2874.
- 666 Pan, G., Feng, Y., Ambegaonkar, A.A., Sun, G., Huff, M., Rauskolb, C., and Irvine,  
667 K.D. (2013). Signal transduction by the Fat cytoplasmic domain. *Development* 140,  
668 831-842.
- 669 R Core Team (2016). R: A Language and Environment for Statistical Computing  
670 (Vienna, Austria.: R Foundation for Statistical Computing).
- 671 Sharp, K.A., and Axelrod, J.D. (2016). Prickle isoforms control the direction of tissue  
672 polarity by microtubule independent and dependent mechanisms. *Biol Open* 5, 229-  
673 236.
- 674 Struhl, G., Casal, J., and Lawrence, P.A. (2012). Dissecting the molecular bridges that  
675 mediate the function of Frizzled in planar cell polarity. *Development* 139, 3665-3674.
- 676 Strutt, D. (2009). Gradients and the specification of planar polarity in the insect  
677 cuticle. *Cold Spring Harb Perspect Biol* 1, a000489.
- 678 Strutt, D., and Strutt, H. (2007). Differential activities of the core planar polarity  
679 proteins during *Drosophila* wing patterning. *Dev. Biol.* 302, 181-194.
- 680 Strutt, D., and Warrington, S.J. (2008). Planar polarity genes in the *Drosophila* wing  
681 regulate the localisation of the FH3-domain protein Multiple Wing Hairs to control  
682 the site of hair production. *Development* 135, 3103-3111.
- 683 Strutt, D.I. (2001). Asymmetric localization of Frizzled and the establishment of cell  
684 polarity in the *Drosophila* wing. *Mol. Cell* 7, 367-375.

- 685 Strutt, H., Gamage, J., and Strutt, D. (2016). Robust asymmetric localization of planar  
686 polarity proteins is associated with organization into signalosome-like domains of  
687 variable stoichiometry. *Cell Rep.* *17*, 2660-2671.
- 688 Strutt, H., and Strutt, D. (2005). Long-range coordination of planar polarity in  
689 *Drosophila*. *BioEssays* *27*, 1218-1227.
- 690 Strutt, H., and Strutt, D. (2008). Differential stability of flamingo protein complexes  
691 underlies the establishment of planar polarity. *Curr. Biol.* *18*, 1555-1564.
- 692 Strutt, H., and Strutt, D. (2009). Asymmetric localisation of planar polarity proteins:  
693 Mechanisms and consequences. *Semin. Cell Dev. Biol.* *20*, 957-963.
- 694 Taylor, J., Abramova, N., Charlton, J., and Adler, P.N. (1998). *Van Gogh*: a new  
695 *Drosophila* tissue polarity gene. *Genetics* *150*, 199-210.
- 696 Tissir, F., and Goffinet, A.M. (2013). Shaping the nervous system: role of the core  
697 planar cell polarity genes. *Nat. Rev. Neurosci.* *14*, 525-535.
- 698 Tree, D.R., Ma, D., and Axelrod, J.D. (2002a). A three-tiered mechanism for  
699 regulation of planar cell polarity. *Semin. Cell Dev. Biol.* *13*, 217-224.
- 700 Tree, D.R., Shulman, J.M., Rousset, R., Scott, M.P., Gubb, D., and Axelrod, J.D.  
701 (2002b). Prickle mediates feedback amplification to generate asymmetric planar cell  
702 polarity signaling. *Cell* *109*, 371-381.
- 703 Usui, T., Shima, Y., Shimada, Y., Hirano, S., Burgess, R.W., Schwarz, T.L., Takeichi,  
704 M., and Uemura, T. (1999). Flamingo, a seven-pass transmembrane cadherin,  
705 regulates planar cell polarity under the control of Frizzled. *Cell* *98*, 585-595.
- 706 Wang, Y., and Nathans, J. (2007). Tissue/planar cell polarity in vertebrates: new  
707 insights and new questions. *Development* *134*, 647-658.
- 708 Warrington, S.J., Strutt, H., Fisher, K.H., and Strutt, D. (2017). A dual function for  
709 prickle in regulating Frizzled stability during feedback-dependent amplification of  
710 planar polarity. *Curr. Biol.* *27*, 2784-2797.
- 711 Wickham, H. (2007). Reshaping Data with the reshape Package. *J. Stat. Softw.* *21*, 1--  
712 20.
- 713 Wickham, H. (2009). *ggplot2: Elegant Graphics for Data Analysis* (Springer-Verlag  
714 New York).

715 Yang, C., Axelrod, J.D., and Simon, M.A. (2002). Regulation of Frizzled by Fat-like  
716 cadherins during planar polarity signaling in the *Drosophila* compound eye. *Cell* 108,  
717 675-688.

718

719

## 720 **FIGURE LEGENDS**

721 [Figure 1](#). A baedeker of the experiments.

722 A summary of all experiments showing the polarities of hairs in the two abdominal  
723 compartments plus the effects of clones on polarity. UAS indicates overexpression of  
724 the said gene in the clones, tub.Gal4 UAS.x indicates generalised expression of x.

725 [Figure 2](#). Clones that overexpress *ft* in various backgrounds.

726 The receiving cells point outwards in the A compartments (A-B), inwards in P  
727 compartments (D-E) of *stan*<sup>-</sup> and wildtype cells. The response of *pk-sple*<sup>-</sup> cells is  
728 inwards in both the A and P compartments (C,F). For all figures, clones are outlined  
729 in red dots, blue boxes delimit the areas detailed at higher magnification, blue arrows  
730 indicate orientation of hairs. For images of clones expressing *fz* in the same  
731 backgrounds, see [Figure S2](#).

732 [Figure 3](#). Effects of the *ft*-overexpressing clones in A and P compartments (cf [Figure](#)  
733 [2](#)).

734 The orientations of hairs immediately adjacent to each clone are counted and  
735 displayed in box plots, each dot represents the data from one clone. The responses  
736 range from all pointing inwards (top of the graph) to all pointing outwards (bottom).  
737 Breaking the Stan system (*stan*<sup>-</sup>) did not much affect any outcome, confirming that  
738 the Ft/Ds system does not act through the Stan system. However removing *pk* and *sple*  
739 changed the sign of response in the A compartment. (Control clones [Genotype 42](#)).

740 [Figure 4](#). Effects of overexpressing *pk* on polarity of cells in which either the Stan  
741 system (*stan*<sup>-</sup>) or the Ds/Ft system is broken (*ft d*<sup>-</sup>).  
742 Background phenotypes (**B-D**). In the A compartments, generalised overexpression of  
743 *pk* changes the polarity of the anterior region of wildtype, *stan*<sup>-</sup> (Genotype 10) and *ft*  
744 *d*<sup>-</sup> cells (**A, E and F**). In the P compartments, the region that normally points  
745 anteriorly in *ft d*<sup>-</sup> points posteriorly (as in the wildtype) when *pk* is overexpressed  
746 (**G**). Compare [Figure S4](#) for expression of *pk* in *d*<sup>-</sup> flies.

747 [Figure 5](#). Effects of overexpressing *sple* on polarity of cells in which either the Stan  
748 system (*stan*<sup>-</sup>) or the Ds/Ft system is broken (*ft d*<sup>-</sup>).

749 Overexpression of *sple* in *stan*<sup>-</sup> and the wildtype reverses all or most of the P  
750 compartment to point forwards (**A and E**) but overexpression of *sple* in a *ft d*<sup>-</sup>  
751 background produces a P compartment of normal polarity (**G**) and even the rear of  
752 the P region, which points forward in *ft d*<sup>-</sup> (**D**) is now “rescued” to normal polarity.  
753 Overexpression of *sple* in *ft d*<sup>-</sup> flies also alters the polarity at the front of the A

754 compartment (C and F) turning the hairs laterally, while overexpressing *pk* turns the  
755 hairs to point anteriorly (Figure 4). Compare Figure S4 for expression of *sple* in *d<sup>-</sup>* flies

756 Figure 6. Behaviour of *fz<sup>-</sup>* and *ft<sup>-</sup>* clones in flies overexpressing isoforms of the *pk* gene.  
757 *fz<sup>-</sup>* clones behave normally, polarising receiving cells inwards in both A and P either in  
758 *tub.Gal4 UAS.pk* or *tub.Gal4 UAS.sple* flies, independently of the polarity of their  
759 surrounds (A and B). The effects of *ft<sup>-</sup>* clones, but only in territories with reversed  
760 polarity, are the opposite of normal: in the wildtype these effects are inwards in A,  
761 outwards in P while in *tub.Gal4 UAS.pk* the cells close to the anterior clones point  
762 outwards (C) and in *tub.Gal4 UAS.sple* the cells nearby the posterior clones point  
763 inwards (D). See Figure S5 for analysis of maximum range of effects of *fz<sup>-</sup>* clones.

764 Figure 7. Effects of *pk*-expressing clones in flies broken for the Ds/Ft system.  
765 Clones that overexpress *pk* polarise *ds<sup>-</sup>* cells strongly inwards (A). Clones lacking  
766 *Vang* (B) as well as clones that, lacking *Vang*, also overexpress *pk* (C), polarise *ds<sup>-</sup>*  
767 receiving cells strongly outwards.

768 Figure 8. Pk and Sple functions in the context of PCP.  
769 PCP depends on molecular bridges between cells: for the Stan system the key bridge  
770 consists of a complex of Stan and Fz in one cell and Stan in the other; *Vang* promotes  
771 function of the Stan pillar of this bridge (Struhl et al., 2012). For the Ds/Ft system, Ds  
772 in one cell is linked to Ft in another, the activity of both is modulated by Fj (reviewed  
773 in Butler and Wallingford, 2017). Pk and/or Sple bind to *Vang* and promote  
774 asymmetrical distribution of *Vang* and other PCP molecules. Yet in the absence of Pk  
775 and Sple, the Stan system can still receive and send polarity information, implying that  
776 it is the asymmetric activation of protein complexes that polarise a cell rather than  
777 asymmetric localisation. Pk and Sple alter the sign of the polarity output of the Ds/Ft  
778 system, but by an unknown mechanism. Yet, Pk and Sple can alter polarity output  
779 even when the Ds/Ft system is broken. The results show that Pk and Sple can act  
780 separately on both systems, implying some general function of Pk and Sple in cell  
781 polarity. The indispensable elements of the two systems are shown in bold.

782



## 783 SUPPLEMENTARY FIGURE LEGENDS

784 **Figure S1.** *fz*-overexpressing clone in the P compartment of a *ds<sup>-</sup>* fly.

785 Hairs point outwards from the clone with range of 2-7 cells. Cells of the clone are  
786 marked with *pawn*, and outlined in red dots. Blue arrows indicate orientation of hairs.

787 **Figure S2.** The effects of *fz*-overexpressing clones on various genetic backgrounds in  
788 the A and P compartments —compare with **Figure 2**.

789 The clones polarise responding wildtype cells outwards in both compartments (**A** and  
790 **B**). This effect is blocked when the Stan system is broken (*stan<sup>-</sup>*) (**C** and **D**). In a *pk-*  
791 *sple<sup>-</sup>* background the sign is also outwards but the range of repolarisation is strongly  
792 reduced in the A compartment. Clones are variously marked, see Genotypes in  
793 **Materials and Methods**.

794 **Figure S3.** Results of similar experiments to those in **Figure 3**, but here the clones were  
795 overexpressing the ectodomain of Ds.

796 The results are comparable with those of **Figure 3** in the A compartments (although of  
797 the opposite sign to *ft*-overexpressing clones, as expected (Casal et al., 2006). None of  
798 the clones had significant effects in the P compartment — this lack of response is most  
799 simply explained by high ambient level of Ds in P, which is suggested by *ds.LacZ*  
800 expression (Casal et al., 2002). A response was visible in flies that lack *four-jointed* (*fj*)  
801 (data not shown), which increases the range of signalling by the Ds/Ft system (Casal et  
802 al., 2006). One-way Anova with post-hoc Tukey HSD analysis showing levels of  
803 significance for **Figure 3** and **S3**, below (vertical lines are the 95% confidence  
804 intervals).

805 **Figure S4.** The effects of overexpression of *pk* and *sple* in *d<sup>-</sup>* flies.

806 In this background the effects of extra Pk are as in *ft d<sup>-</sup>* flies: the anterior part of the A  
807 compartment points forward and the polarity of the P compartment is “rescued”  
808 (compare **C** and **D** with **A** and **B**; see **Figure 4**). However extra Sple increases the area  
809 of anteriorwards polarity in the P compartment (compare **E** with **B**; see **Figure 5**).

810 **Figure S5.** Range measurements for *fz*-expressing clones in wildtype and flies with a  
811 broken Ds/Ft system (*ds<sup>-</sup>*).

812 For each clonal perimeter the maximum number of cell rows showing an induced  
813 polarity change was measured. Below are the results of one-way Anova with post-hoc  
814 Tukey HSD analysis.

815 **Figure S6.** Ventral cuticle of the abdominal segments stained for lacZ; **A**, *ds.lacZ*  
816 expression; **B**, *ds.lacZ* expression in *pk-sple<sup>-</sup>*; **C**, *fj.lacZ* expression; **D**, *fj.lacZ*

817 expression in *pk-sple*<sup>-</sup>. Red dots delineate the approximate boundaries between the A  
818 and the P compartments. Arrows indicate the orientation of cell hairs in the pleura.

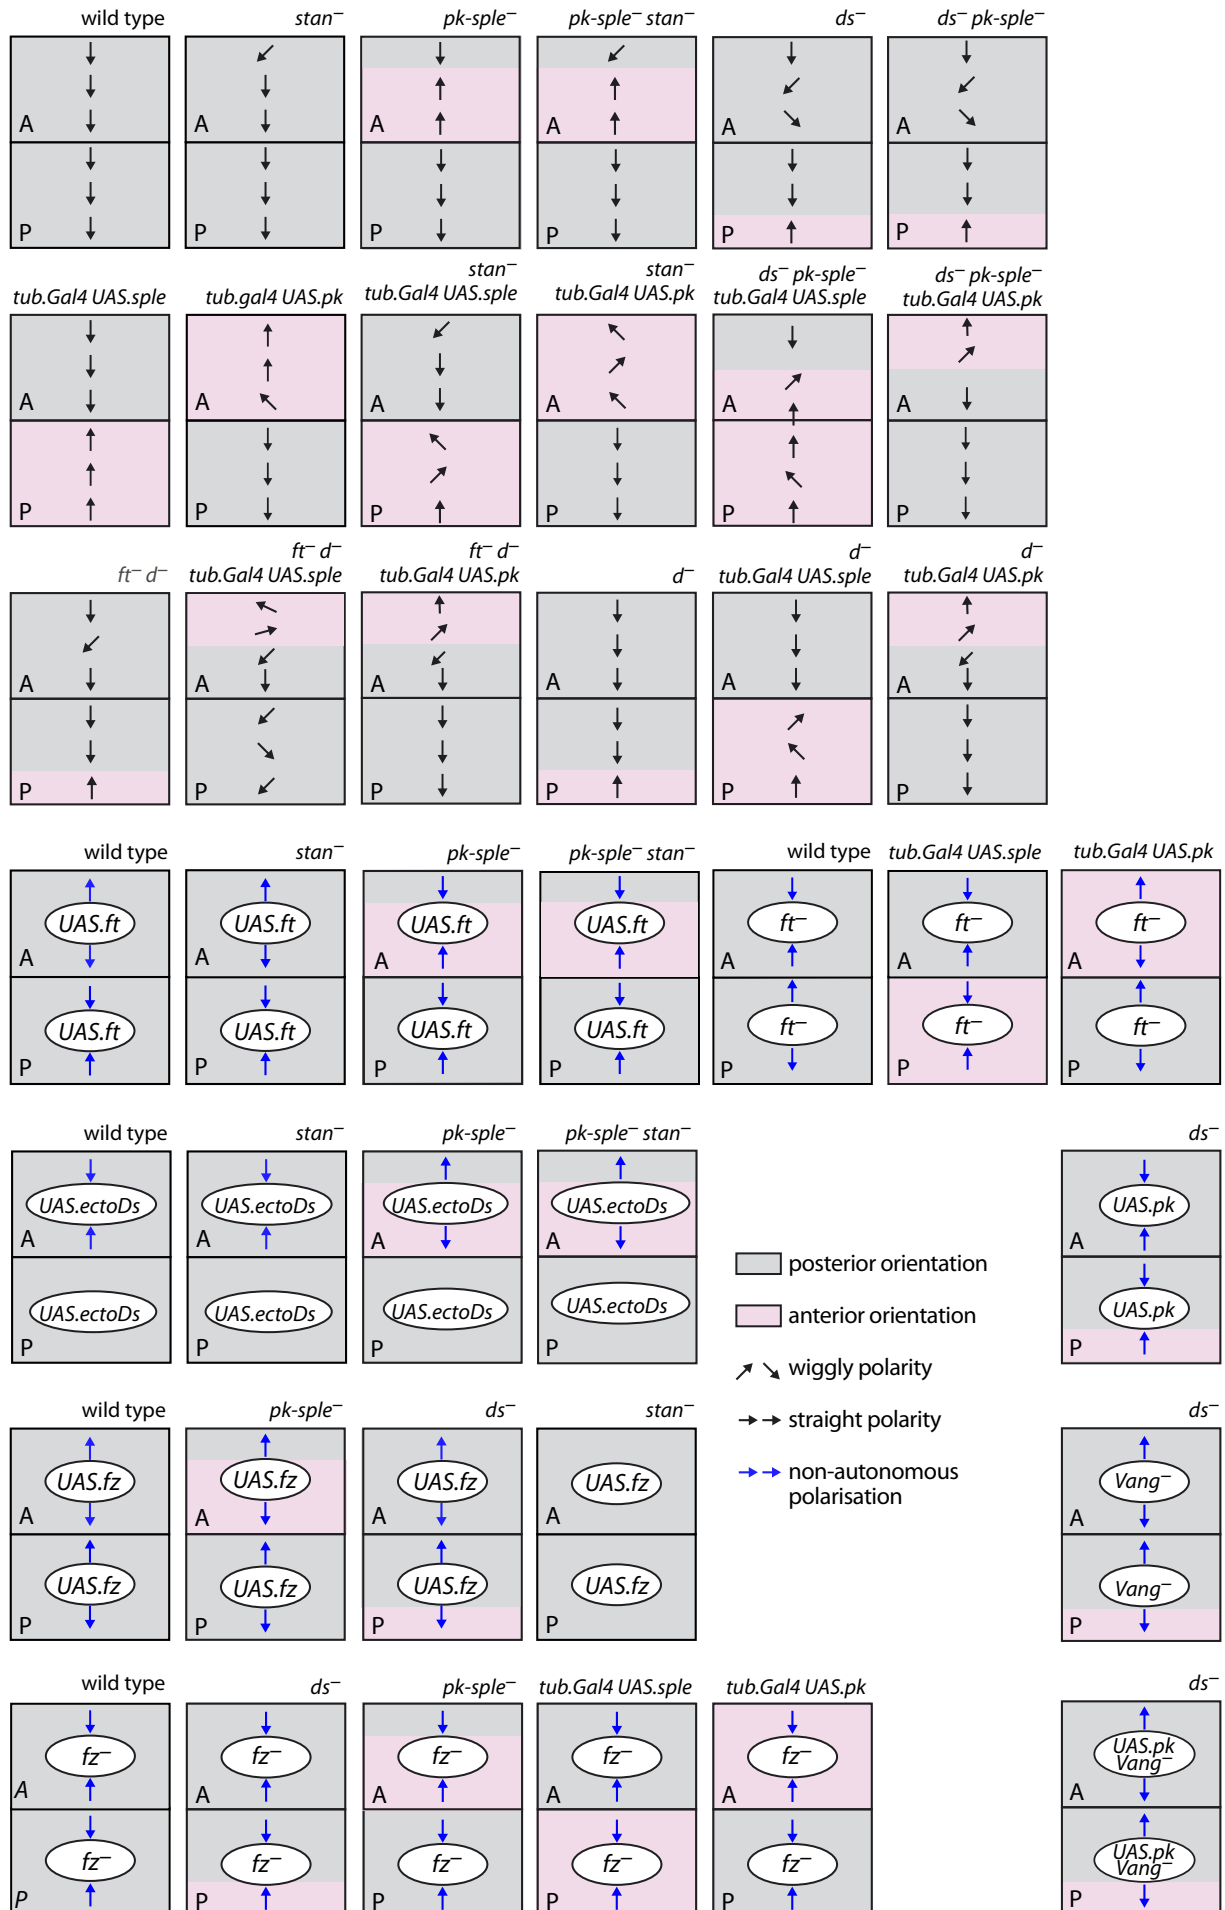

figure 1

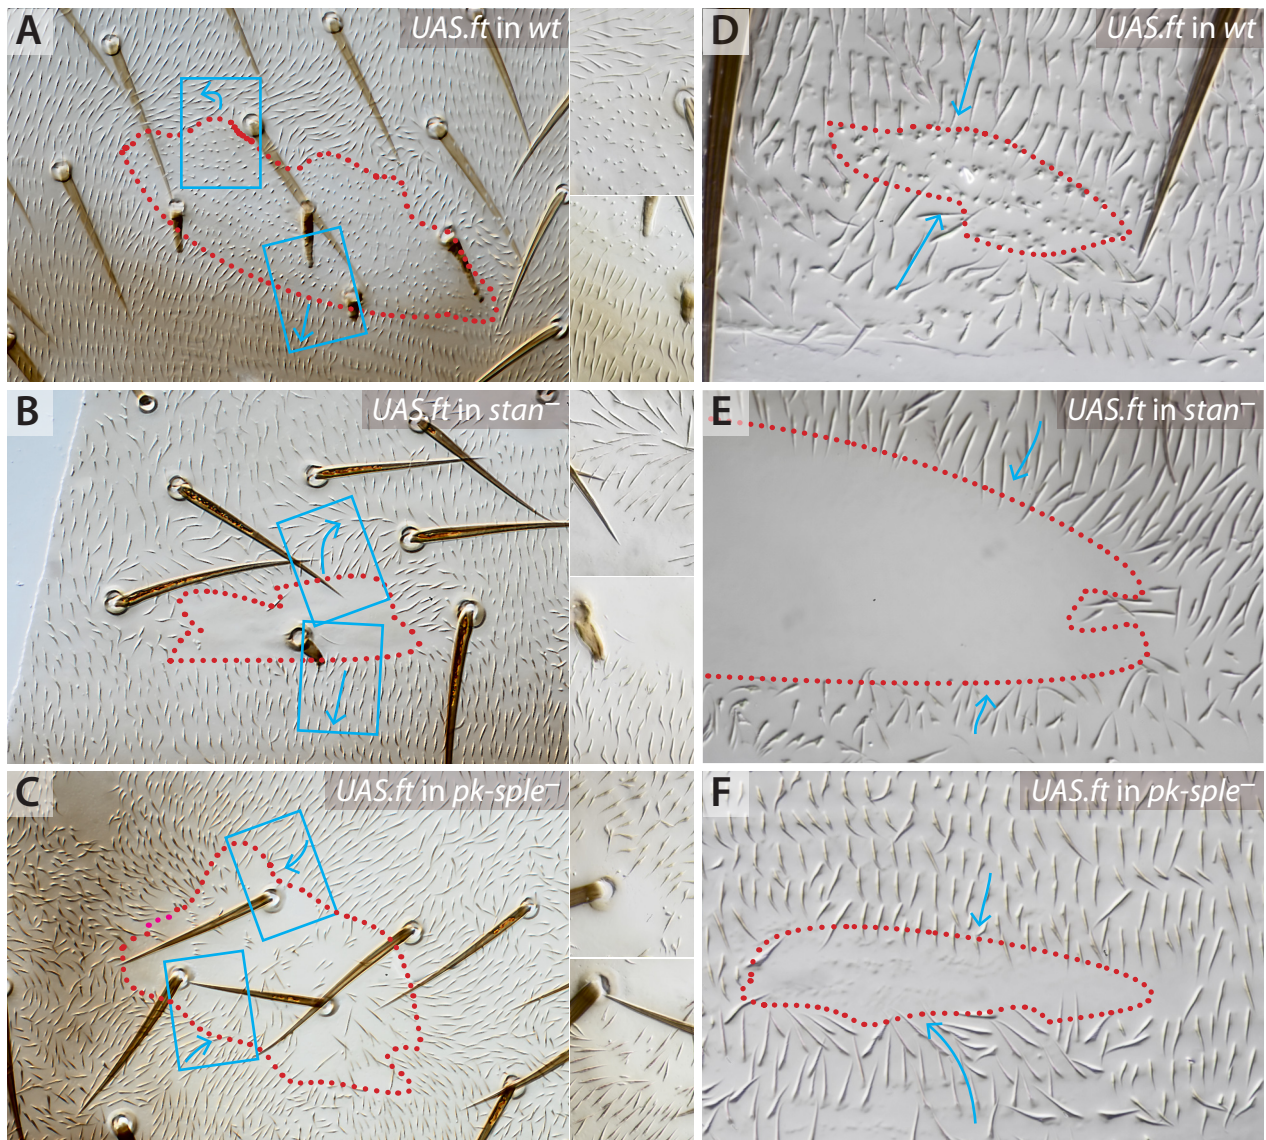

figure 2

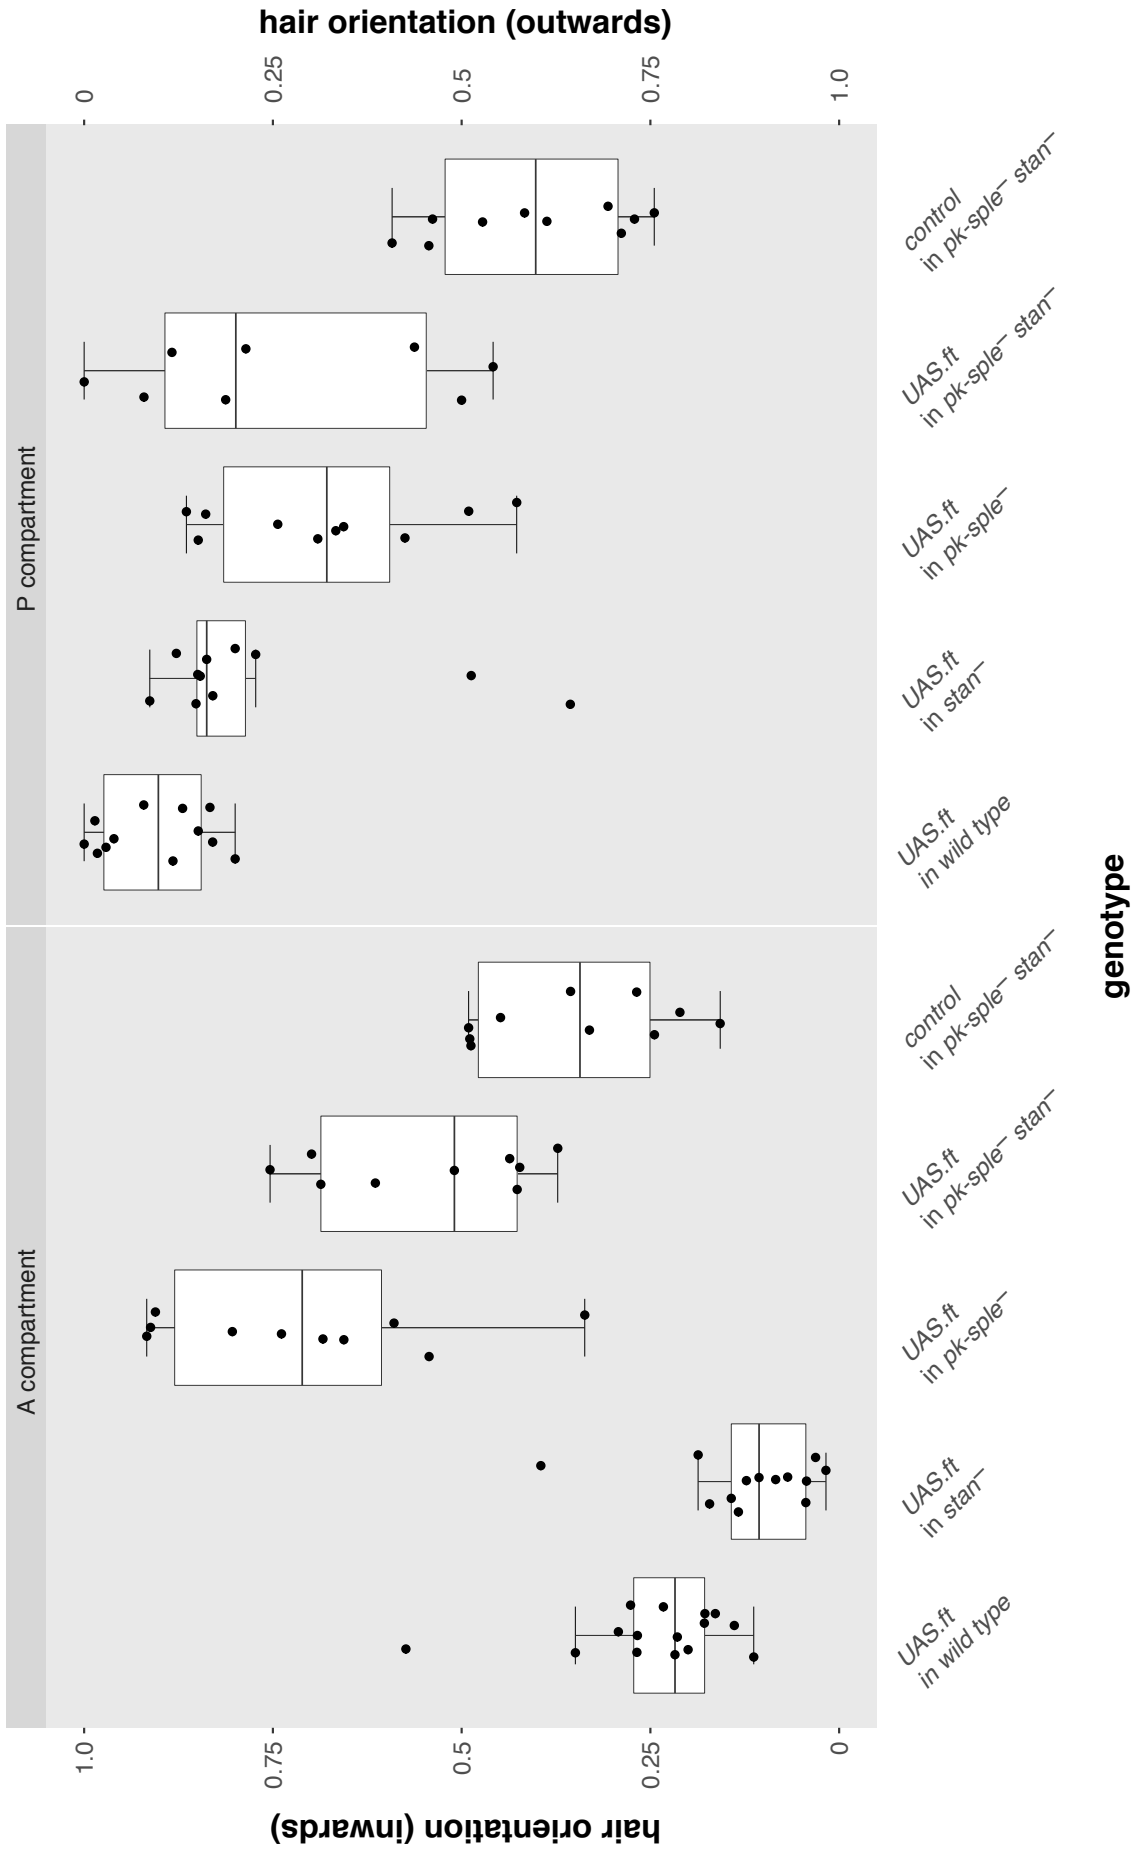

figure 3



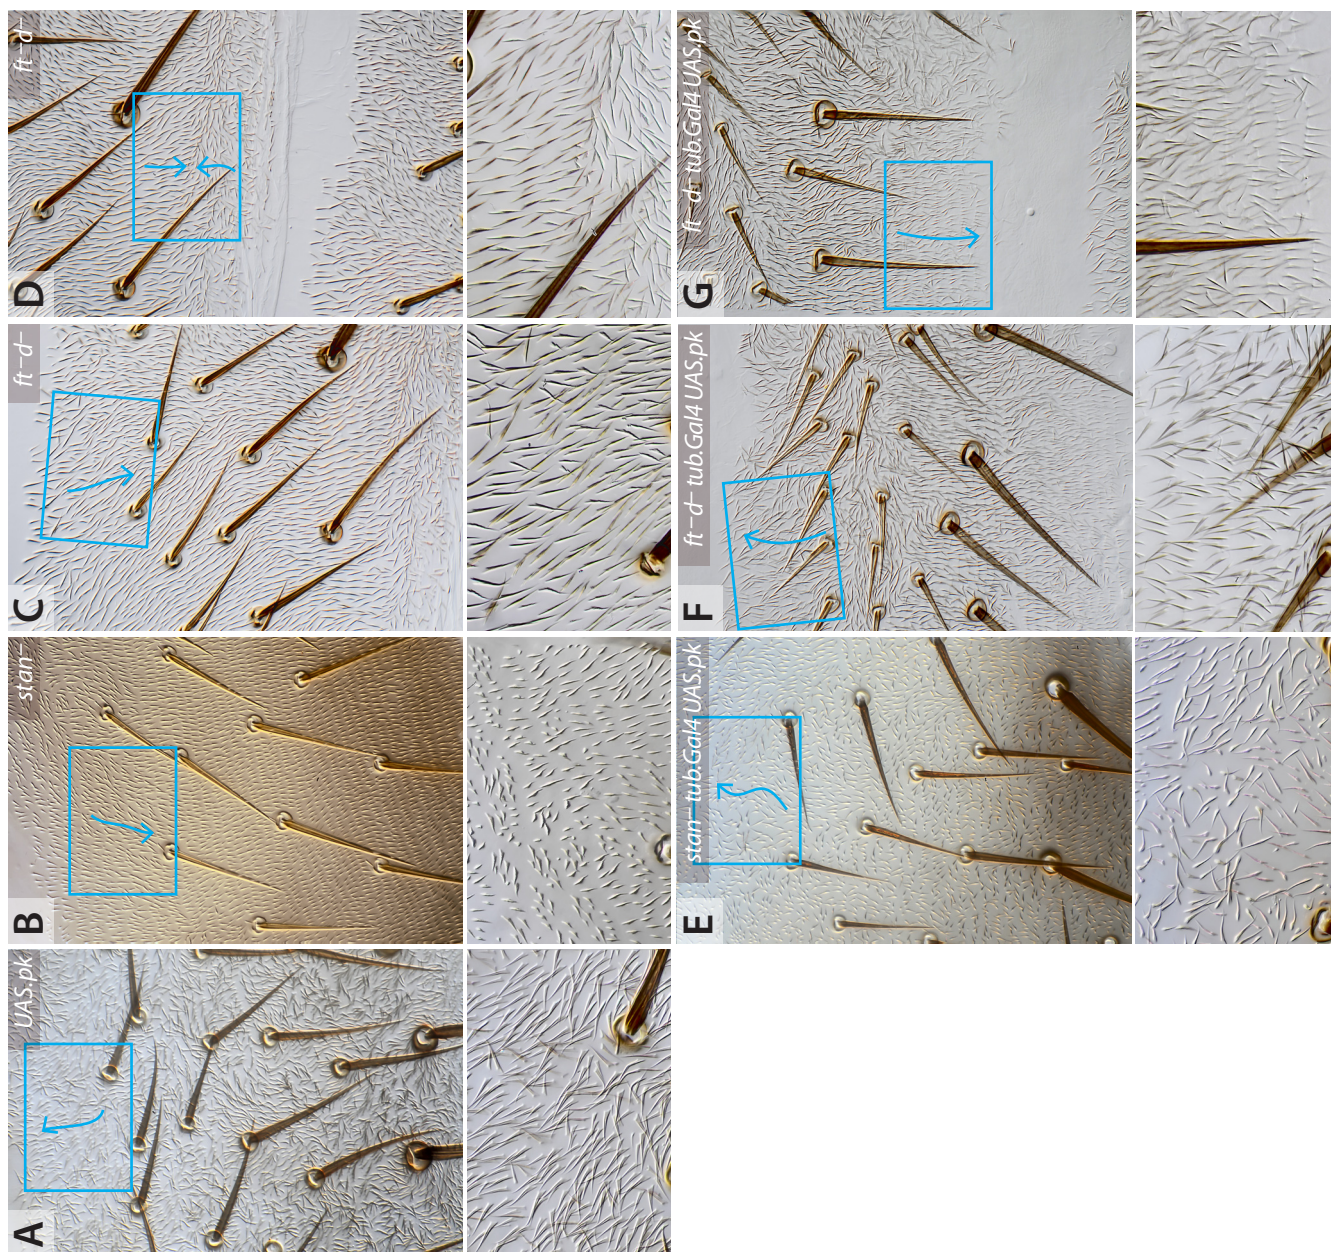

figure 4



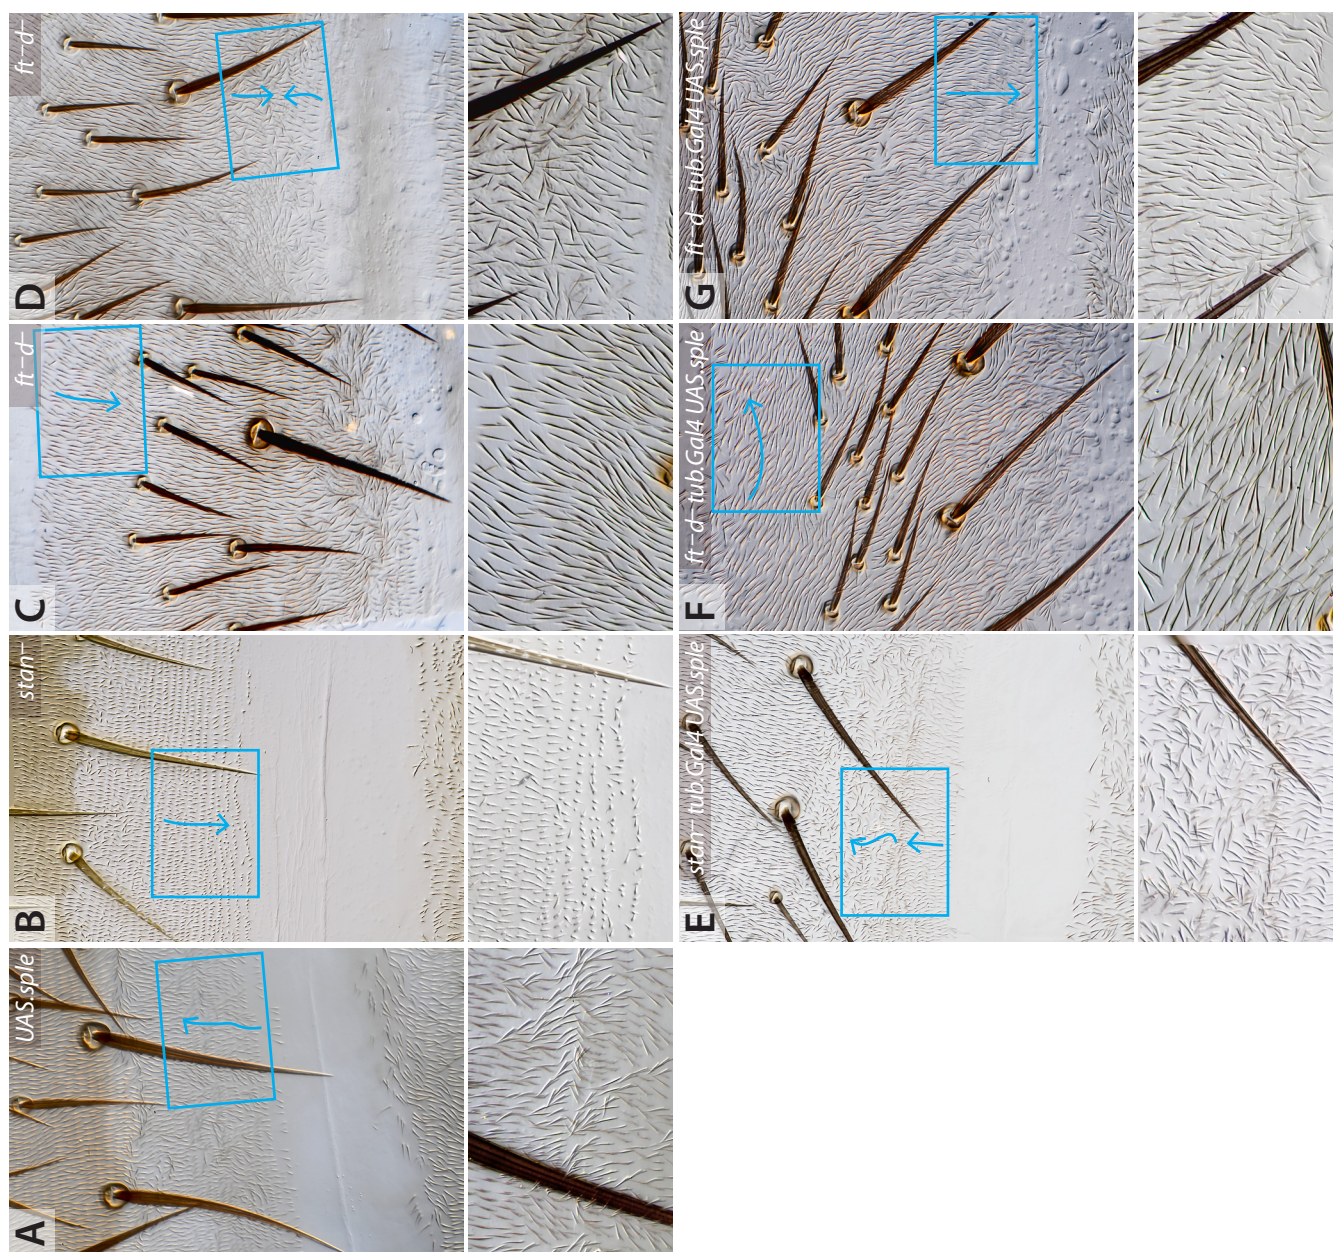

figure 5



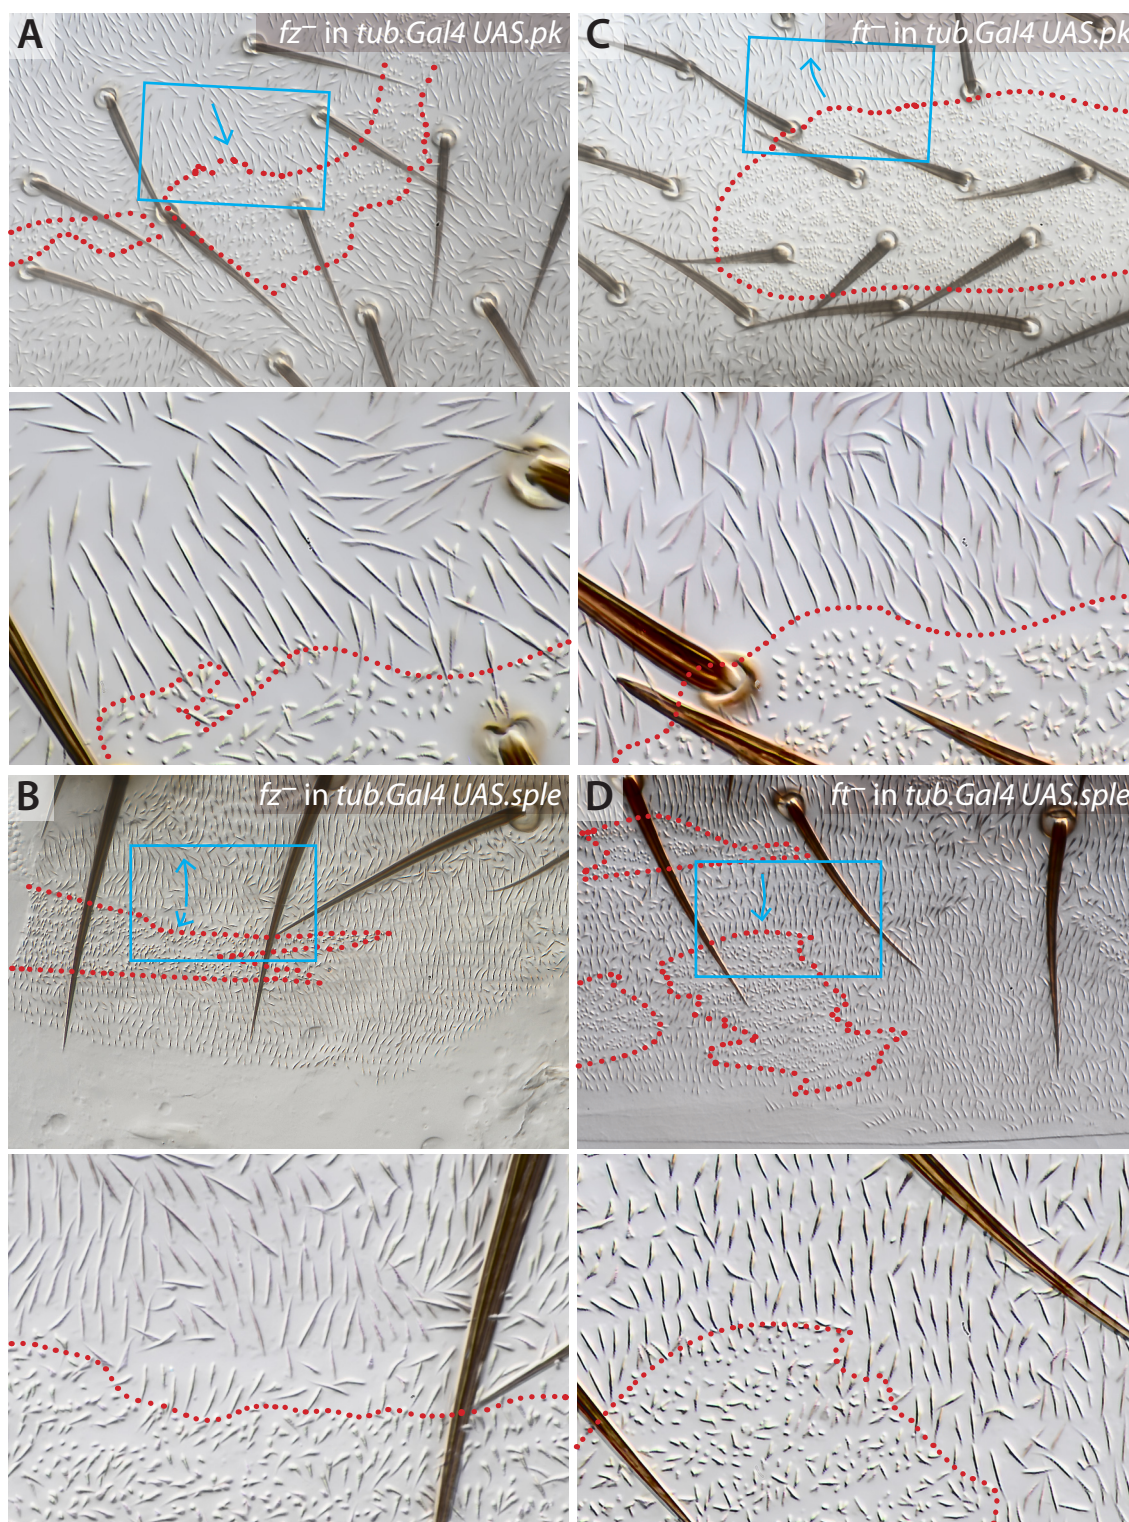

figure 6



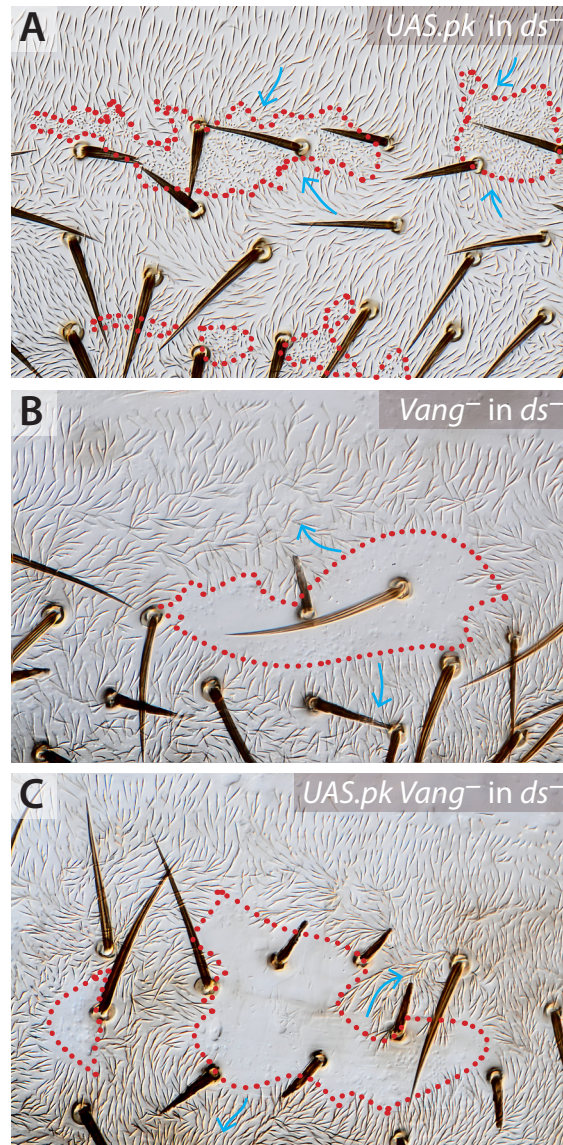

figure 7

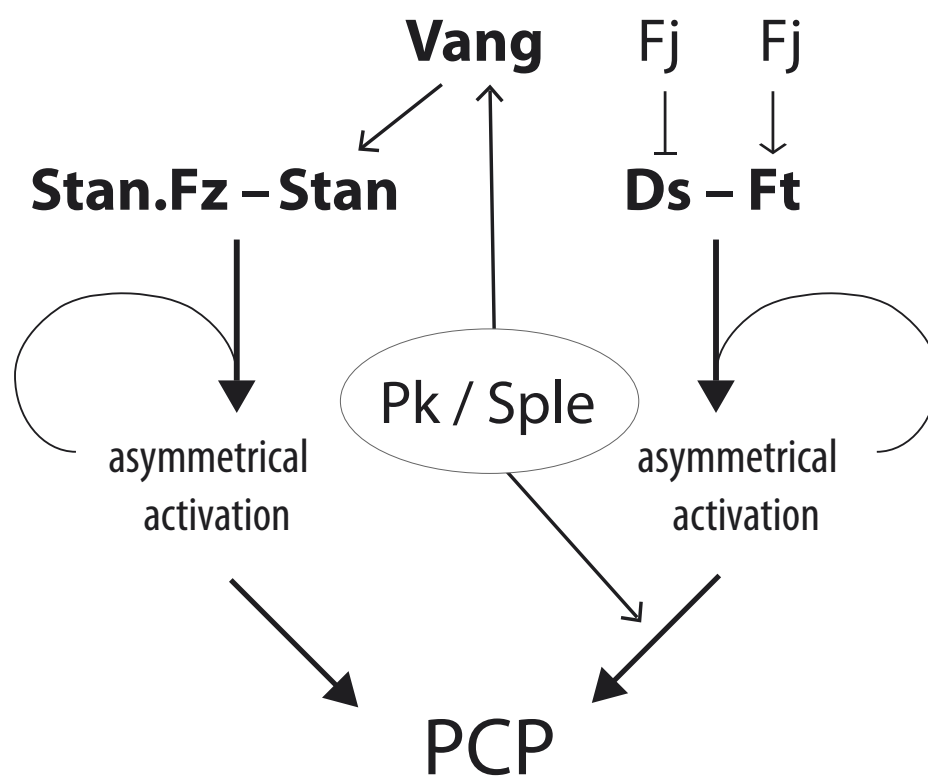

figure 8

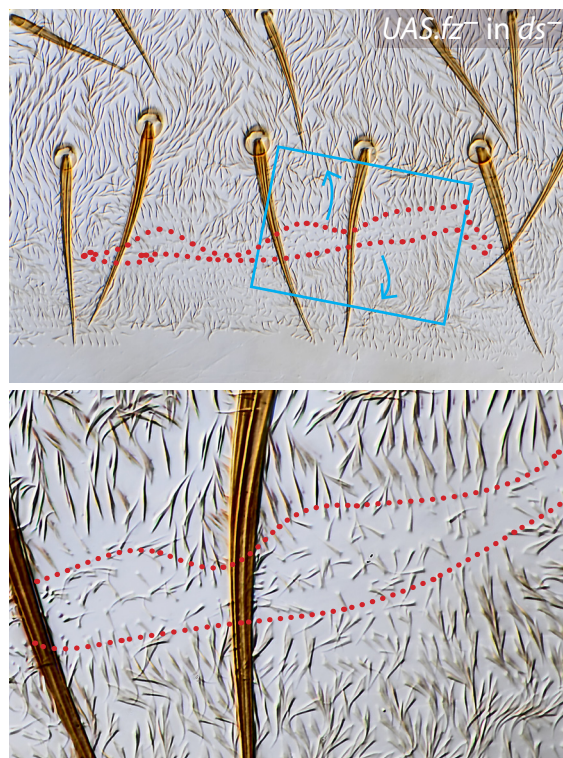

figure S1



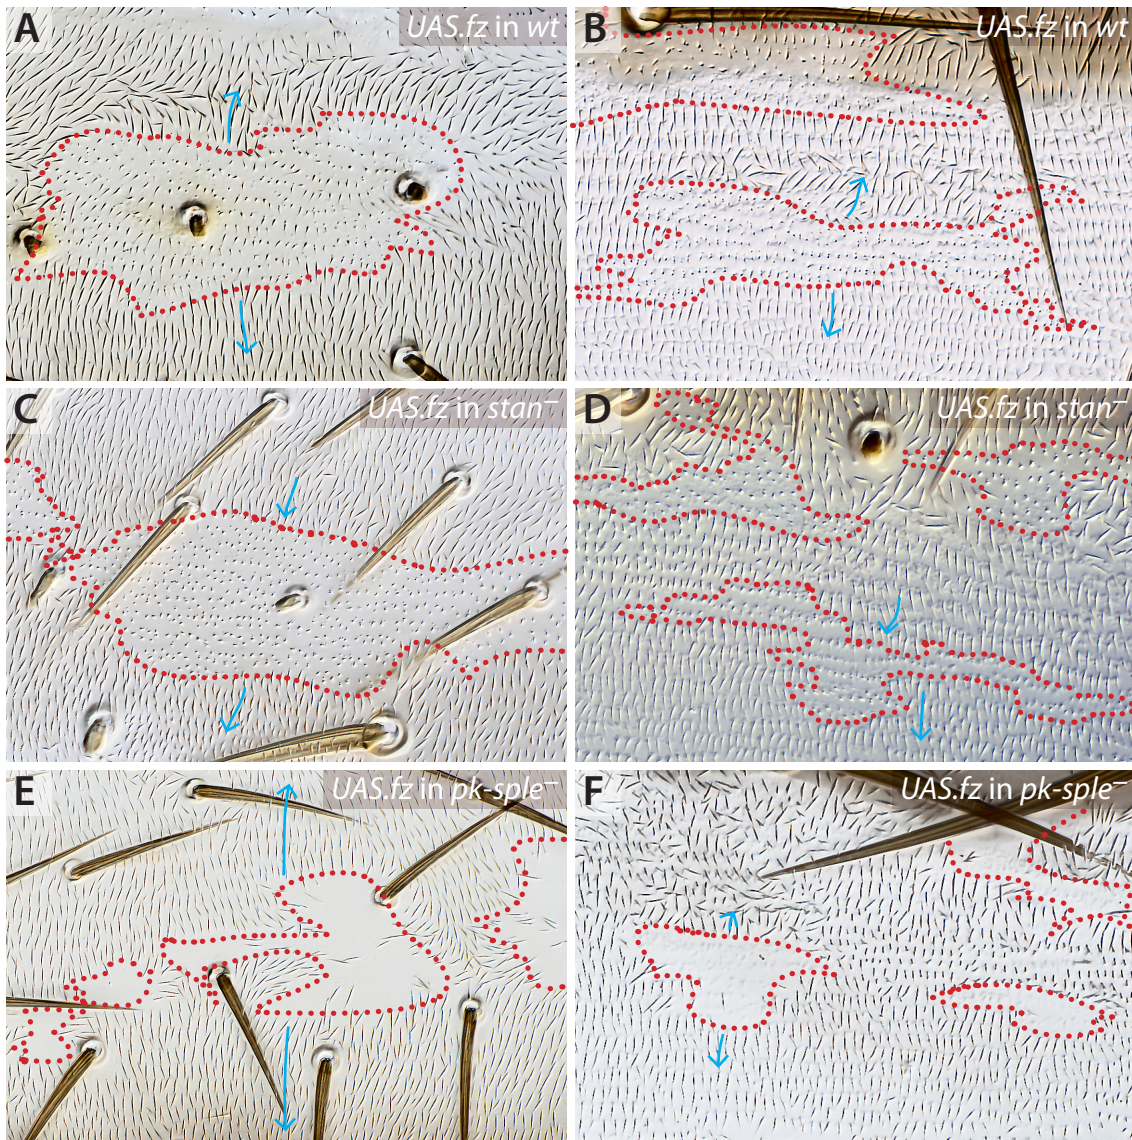

figure S2

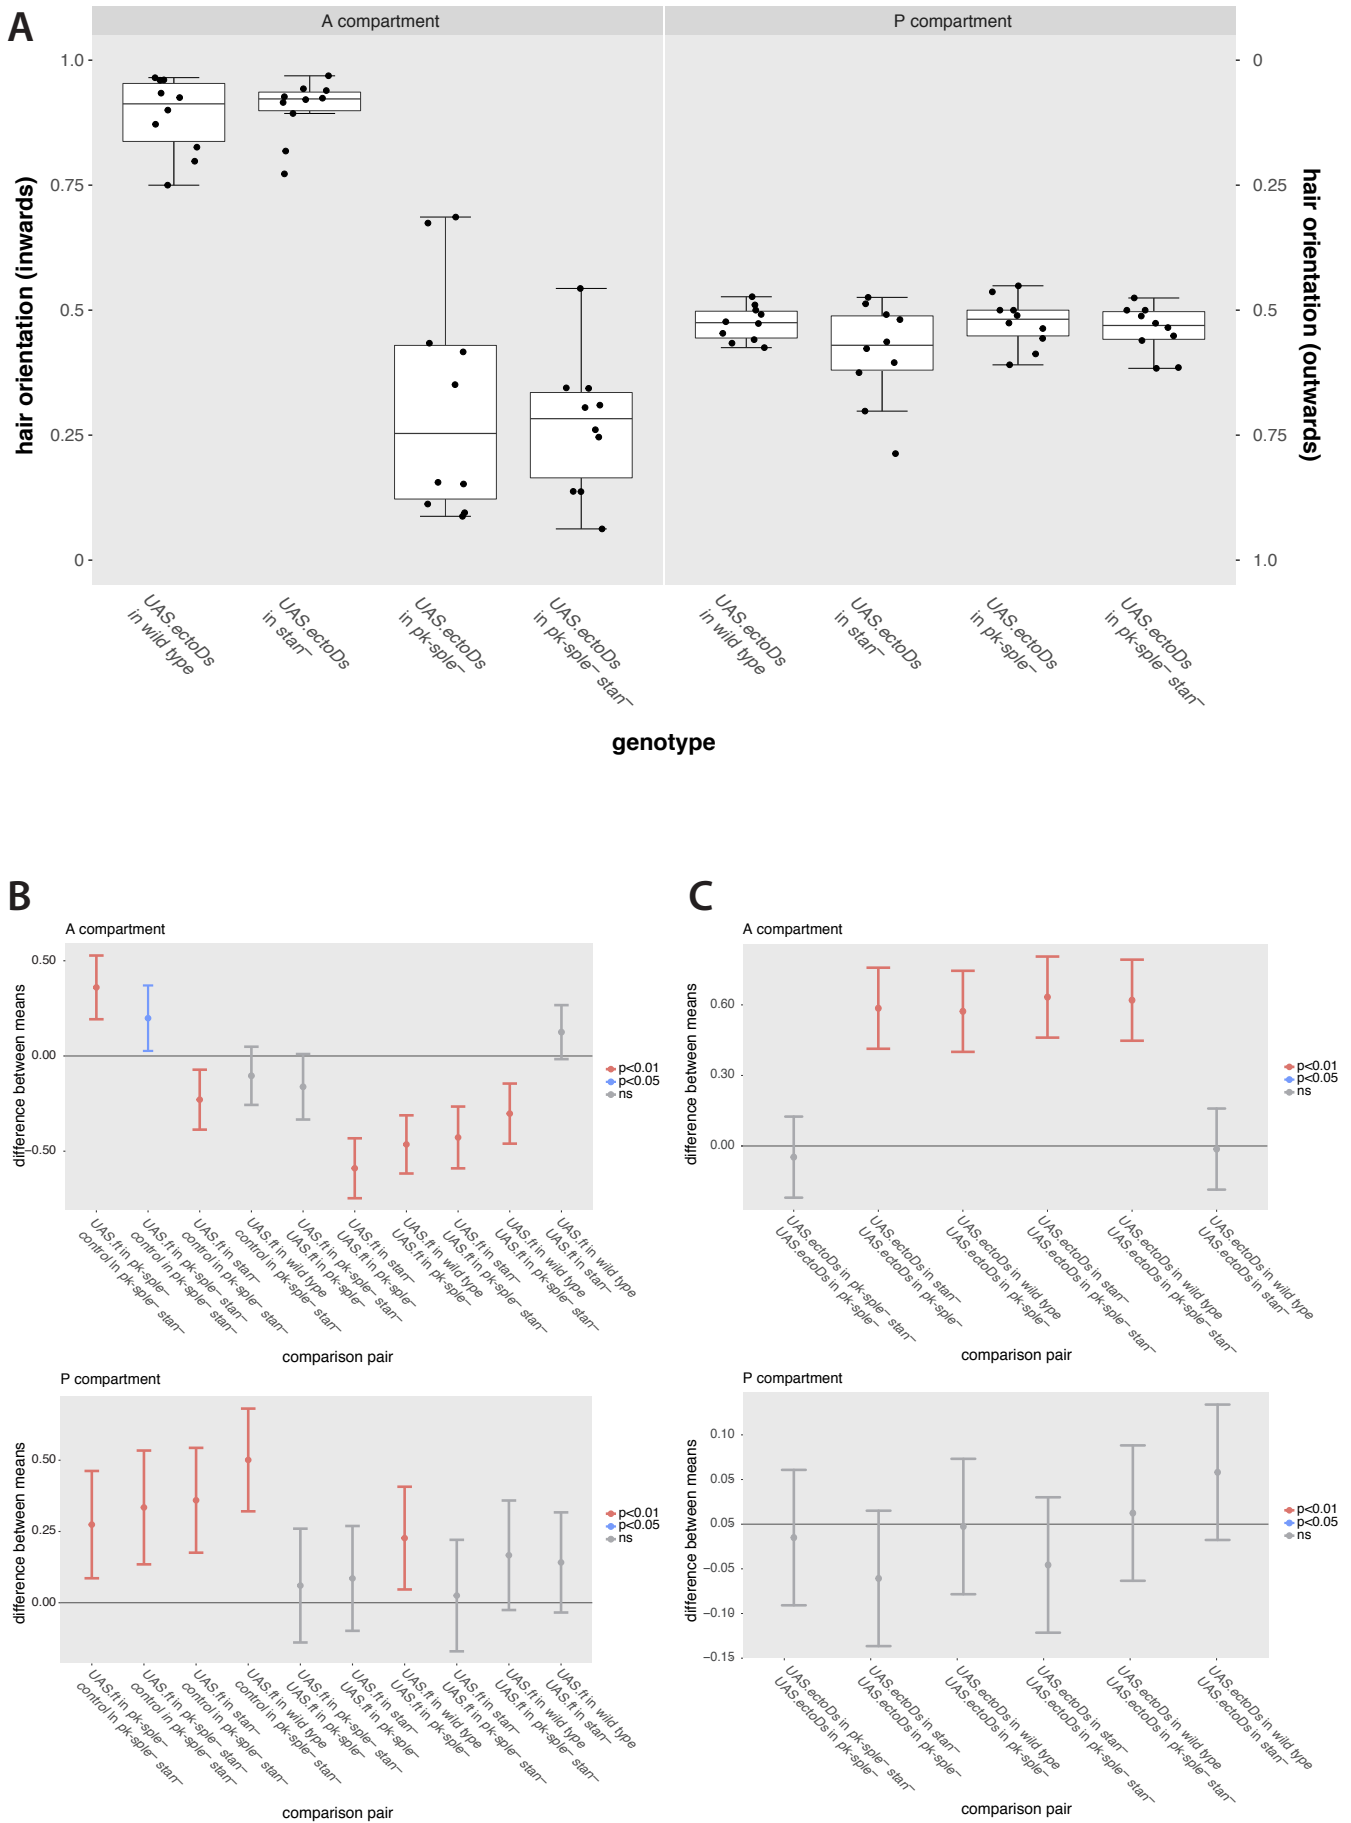





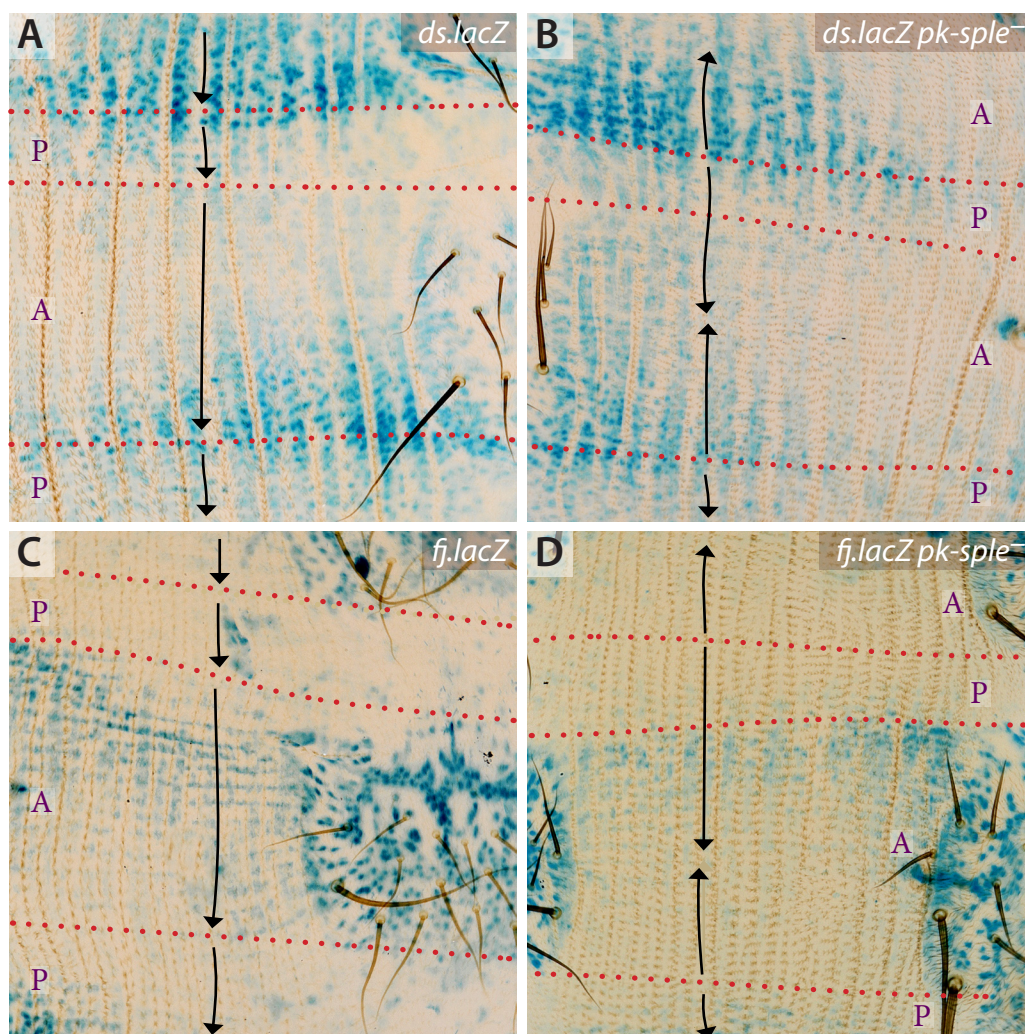

figure S6
